# Supplementary material for: Applying machine learning to balance performance and stability of high energy density materials
Source: PubMed Central journal article supplement (PMC7957118; doi:10.1016/j.isci.2021.102240), 2021-02-26
Supplement: mmc1.pdf [file mmc1.pdf]

iScience, Volume 24

## **Supplemental information**

### **Applying machine learning to balance performance and stability of high energy density materials**

**Xiaona Huang, Chongyang Li, Kaiyuan Tan, Yushi Wen, Feng Guo, Ming Li, Yongli Huang, Chang Q. Sun, Michael Gozin, and Lei Zhang**

# Supplementary Information

## Table of contents

|                                                                                                                                                                                                                                            |    |
|--------------------------------------------------------------------------------------------------------------------------------------------------------------------------------------------------------------------------------------------|----|
| Transparent methods.....                                                                                                                                                                                                                   | 2  |
| Table S3. Collected experimental data of heat of explosion $Q_{max}$ , detonation velocity $D$ , and detonation pressure $p_{C-J}$ , decomposition temperature $T_d$ , and melting temperature of the 153 HEDMs studied in this work ..... | 3  |
| Table S4. Feature importance ranking by the magnitude of Pearson correlation coefficients .....                                                                                                                                            | 19 |
| Figure S1. XGBoost prediction residuals for $Q_{max}$ , $D$ , $p_{C-J}$ , $T_d$ , and $LE$ .....                                                                                                                                           | 21 |
| Figure S2. Prediction of heat of explosion $Q_{max}$ with AdaBoost model .....                                                                                                                                                             | 22 |
| Figure S3. Prediction of heat of explosion $Q_{max}$ with RF model .....                                                                                                                                                                   | 22 |
| Figure S4. Prediction of heat of explosion $Q_{max}$ with MLP model.....                                                                                                                                                                   | 23 |
| Figure S5. Prediction of heat of explosion $Q_{max}$ with KRR model.....                                                                                                                                                                   | 23 |
| Figure S6. Prediction of detonation velocity $D$ with AdaBoost model .....                                                                                                                                                                 | 24 |
| Figure S7. Prediction of detonation velocity $D$ with RF model .....                                                                                                                                                                       | 24 |
| Figure S8. Prediction of detonation velocity $D$ with MLP model.....                                                                                                                                                                       | 25 |
| Figure S9. Prediction of detonation velocity $D$ with KRR model.....                                                                                                                                                                       | 25 |
| Figure S10. Prediction of detonation pressure $p_{C-J}$ with AdaBoost model.....                                                                                                                                                           | 26 |
| Figure S11. Prediction of detonation pressure $p_{C-J}$ with RF model.....                                                                                                                                                                 | 26 |
| Figure S12. Prediction of detonation pressure $p_{C-J}$ with MLP model.....                                                                                                                                                                | 27 |
| Figure S13. Prediction of detonation pressure $p_{C-J}$ with KRR model.....                                                                                                                                                                | 27 |
| Figure S14. Prediction of decomposition temperature $T_d$ with AdaBoost model.....                                                                                                                                                         | 28 |
| Figure S15. Prediction of decomposition temperature $T_d$ with RF model.....                                                                                                                                                               | 28 |
| Figure S16. Prediction of decomposition temperature $T_d$ with MLP model .....                                                                                                                                                             | 29 |
| Figure S17. Prediction of decomposition temperature $T_d$ with KRR model .....                                                                                                                                                             | 29 |
| Figure S18. Prediction of lattice energy $LE$ with AdaBoost model.....                                                                                                                                                                     | 30 |
| Figure S19. Prediction of lattice energy $LE$ with RF model.....                                                                                                                                                                           | 30 |
| Figure S20. Prediction of lattice energy $LE$ with MLP model .....                                                                                                                                                                         | 31 |
| Figure S21. Prediction of lattice energy $LE$ with KRR model .....                                                                                                                                                                         | 31 |
| Figure S22. Optimal range of oxygen balance in balancing detonation performance and stability of HEMDs.....                                                                                                                                | 32 |
| Figure S23. Optimal range of HB amount in balancing detonation performance and stability of HEMDs .....                                                                                                                                    | 33 |
| Figure S24. Optimal range of HB strength in balancing detonation performance and stability of HEMDs .....                                                                                                                                  | 34 |
| Figure S25. Optimal range of density in balancing detonation performance and stability of HEMDs.....                                                                                                                                       | 35 |
| Figure S26. Optimal range of strength of the weakest intramolecular bond in balancing detonation performance and stability of HEMDs.....                                                                                                   | 36 |
| Figure S27. Optimal range of molecular weight in balancing detonation performance and stability of HEMDs.....                                                                                                                              | 37 |
| References .....                                                                                                                                                                                                                           | 38 |

## Transparent methods

All the 21648 physicochemical parameters, detonation performance parameters and stability properties of 153 HEDMs were calculated directly on a crystal level based on the recently developed supercomputing density functional theory (DFT) software, namely, High Accuracy atomistic Simulation package for Energetic Materials (HASEM)(Zhang et al., 2016), which is adapted to modern supercomputers on the basis of the J parallel Adaptive Structured Mesh applications INfrastructure (JASMIN)(Mo et al., 2010).

The training and evaluation of XGBoost model were performed using the XGBoost package, and those of AdaBoost, RF, MLP, and KRR were performed using the scikit-learn package. Stratified sampling was employed to classify training set and test set by a ratio of 4:1. Grid search and cross-validation loop were conducted to optimize the hyperparameters in predicting detonation velocity  $D$ , detonation pressure  $p_{C-J}$ , heat of explosion  $Q_{max}$ , decomposition temperature  $T_d$  and lattice energy  $LE$  of the HEDMs. By evaluating the scoring metrics, the distribution of prediction residuals and the deviation from experimental data, the best performing model was selected for feature importance analysis.

**Table S3. Collected experimental data of detonation performance (heat of explosion  $Q_{max}$ , in kcal/kg, detonation velocity  $D$ , in km/s, and detonation pressure  $p_{C-J}$ , in GPa), molecule stability (decomposition temperature  $T_d$ , in °C), and crystal stability (melting temperature, in °C) of the 153 HEDMs studied in this work. Solid scatters ● are for the densely pressed samples with  $\rho \geq 95\% \rho_{max}$ , and open circles ○ are for those compounds with  $\rho < 95\% \rho_{max}$ , wherein  $\rho_{max}$  is the maximum theoretical density as determined by X-ray crystallography. The value in the bracket of the  $T_d$  column is the heating rate, in °C per minute, and the thermal analysis method (if it is recorded in the original experiment) is also presented. (Related to Figure 4)**

|   | CSD No.  | CAS No.     | Detonation performance      |                                 |                                 | Molecule stability            |        | Crystal stability                |
|---|----------|-------------|-----------------------------|---------------------------------|---------------------------------|-------------------------------|--------|----------------------------------|
|   |          |             | $Q_{max}$                   | $D$                             | $p_{C-J}$                       | $T_d$                         | method | Melting temperature              |
| 1 | SEDTUQ   | 145250-81-3 | --                          | --                              | --                              | 230.85(Crawford et al., 2007) | DSC    | 238(decomp)(Cai et al., 2004)    |
| 2 | NOETNA02 | 19836-28-3  | 1248(●)(Meyer et al., 2007) | 8.85(●)(Tsyshvsky et al., 2017) | 35.5(●)(Dong et al., 1989)      | 177.4(Liu et al., 2016)       | DSC    | 93.5(Liu et al., 2016)           |
| 3 | TATNBZ   | 3058-38-6   | 935(●)(Aksent, 1989)        | 7.76(●)(Keshavarz, 2008)        | 26.8(●)(Wang et al., 2006)      | 366.4(Nair et al., 2007)      | DSC    | 365(Atkins et al., 1986)         |
| 4 | NTROMA01 | 75-52-5     | 1152(●)(Keshavarz, 2012)    | 6.35(○)(Meyer et al., 2007)     | --                              | 390(Taylor et al., 2002)      | --     | -28.6(Bagryanskaya et al., 1983) |
| 5 | SEDTUQ09 | 145250-81-3 | 978(●)(Meyer et al., 2007)  | 8.34(●)(Bemm et al., 1998)      | 34.0(●)(Bemm and Östmark, 1998) | --                            | --     | --                               |

|    |          |             |                              |                                      |                              |                               |     |                               |
|----|----------|-------------|------------------------------|--------------------------------------|------------------------------|-------------------------------|-----|-------------------------------|
| 6  | SEDTUQ06 | 145250-81-3 | --                           | --                                   | --                           | --                            | --  | --                            |
| 7  | NXENAM01 | 4185-47-1   | 1304(●)(Keshavarz, 2005)     | 8.00(●)(Rotstein et al., 1979)       | 31.0(●)(Wang et al., 2006)   | 189.6(10)(Zhang et al., 2018) | DSC | 51.32(10)(Zhang et al., 2018) |
| 8  | NOEURA   | 918-99-0    | 1465(●)(Meyer et al., 2007)  | 9.00(●)(Rotstein and Petersen, 1979) | --                           | --                            | --  | 185(Kwasny et al., 1980)      |
| 9  | NABMUY01 | 28464-24-6  | --                           | 8.10(●)(Tsyshvsky et al., 2017)      | --                           | --                            | --  | --                            |
| 10 | PERYTN12 | 78-11-5     | 1504(●)(Dong and Zhou, 1989) | 8.60(●)(Dong and Zhou, 1989)         | 35.0(●)(Kamlet et al., 1968) | 208(Lee et al., 2002)         | DSC | 142.2(Lange et al., 2009)     |
| 11 | ZZZQSC02 | 606-20-2    | 795(○)(Keshavarz, 2012)      | --                                   | --                           | 285(Lewis et al., 1996)       | --  | 66(Bachman et al., 1958)      |
| 12 | TNOXYL   | 632-92-8    | 844(○)(Keshavarz, 2005)      | 6.70(●)(Wang et al., 2006)           | 21.2(●)(Wang et al., 2006)   | 209(Guo et al., 2006)         | DSC | 182(Meyer et al., 2016)       |
| 13 | DNNAPH   | 605-71-0    | 724(○)(Keshavarz, 2012)      | 5.52(●)(Wang et al., 2006)           | --                           | --                            | --  | 217(Trotter, 1960)            |

|    |          |            |                             |                                      |                               |                                |     |                                   |
|----|----------|------------|-----------------------------|--------------------------------------|-------------------------------|--------------------------------|-----|-----------------------------------|
| 14 | GEMZAZ   | 55510-04-8 | 717(○)(Meyer et al., 2007)  | 7.58(○)(Dong and Zhou, 1989)         | 30.1(●)(Wang et al., 2006)    | 215(Khire et al., 2005)        | DTA | 249(decomp)(Boileau et al., 1985) |
| 15 | HNIABZ20 | 19159-68-3 | 1420(●)(Headquarters, 1984) | 7.31(○)(Keshavarz, 2008)             | --                            | 348.1(10)(Zhang et al., 2013)  | DSC | 215(Leemann et al., 1908)         |
| 16 | PUTCEM   | 25243-36-1 | 980(○)(Meyer et al., 2007)  | 7.25(●)(Keshavarz, 2008)             | --                            | 394.0(5)(Altmann et al., 1998) | --  | 378(Meyer et al., 2016)           |
| 17 | NTRGUA03 | 556-88-7   | 653(●)(Meyer et al., 2007)  | 7.98(○)(Keshavarz et al., 2005)      | 24.5(●)(Hobbs et al., 1993)   | 230(Antonangeli et al., 2010)  | --  | 232(decomp)(Davis et al., 1925)   |
| 18 | DNEDAM   | 505-71-5   | 1023(●)(Meyer et al., 2007) | 8.23(●)(Rotstein and Petersen, 1979) | 27.3(○)(Gill et al., 2006)    | 180.3(Hussein et al., 2018)    | DSC | 178(Hall et al., 1951)            |
| 19 | CORYIR   | 55-63-0    | 1485(●)(Meyer et al., 2007) | 7.59(○)(Meyer et al., 2007)          | 25.3(○)(Hobbs and Baer, 1993) | 50(Kim et al., 2018)           | --  | 14(Altenburg et al., 2009)        |
| 20 | CIWMEA10 | 97645-24-4 | 1516(●)(Keshavarz, 2012)    | --                                   | --                            | 226(Sikder et al., 2004)       | DSC | 100(Singh et al., 2005)           |

|    |          |            |                                    |                                        |                                       |                                       |     |                               |
|----|----------|------------|------------------------------------|----------------------------------------|---------------------------------------|---------------------------------------|-----|-------------------------------|
| 21 | QOYJOD   | 932-64-9   | 722(●)(Vol<br>k et al.,<br>1997)   | 7.86(●)(Me<br>yer et al.,<br>2007)     | 31.5(○)(A<br>kst, 1989)               | 279(Wu et al.,<br>2015)               | DSC | 270(Schmidt et al.,<br>1965)  |
| 22 | WEKGUP   | 25242-76-6 | 1271(●)(M<br>eyer et al.,<br>2007) | 7.77(○)(Me<br>yer et al.,<br>2007)     | --                                    | 170.0(6)(Licht et<br>al., 1988)       | DTA | --                            |
| 23 | DNITBZ02 | 100-25-4   | --                                 | 6.50(●)(Wa<br>ng et al.,<br>2006)      | --                                    | --                                    | --  | 174(Boyer et al., 1959)       |
| 24 | DNBENZ11 | 99-65-0    | --                                 | 6.38(●)(Wa<br>ng et al.,<br>2006)      | --                                    | 216.8(Wang et<br>al., 2014)           | DSC | 90.3(McNeil et al.,<br>2013)  |
| 25 | ZZZGVU02 | 121-14-2   | 763(○)(Kes<br>havarz,<br>2012)     | --                                     | --                                    | 280(Colonna et<br>al., 2010)          | --  | 70(Bachman and Vogt,<br>1958) |
| 26 | TNITAN   | 3698-54-2  | 1023(○)(M<br>eyer et al.,<br>2007) | --                                     | --                                    | 216(decomp)(Dob<br>ratz et al., 1985) | --  | --                            |
| 27 | CTMTNA03 | 121-82-4   | 1340(●)(A<br>kst, 1989)            | 8.75(●)(Do<br>ng and<br>Zhou,<br>1989) | 34.7(●)(P<br>olitzer et<br>al., 2011) | --                                    | --  | --                            |
| 28 | CTMTNA04 | 121-82-4   | --                                 | --                                     | --                                    | 235(10)(Jiao et<br>al., 2014)         | DSC | 206(10)(Jiao et al.,<br>2014) |

|    |          |             |                              |                                    |                                     |                            |     |                                |
|----|----------|-------------|------------------------------|------------------------------------|-------------------------------------|----------------------------|-----|--------------------------------|
| 29 | OCHTET   | 2691-41-0   | --                           | --                                 | --                                  | --                         | --  | --                             |
| 30 | OCHTET01 | 2691-41-0   | 1321(●)(Dong and Zhou, 1989) | 9.01(●)(Politzer and Murray, 2011) | 37.3(●)(Wang et al., 2006)          | --                         | --  | --                             |
| 31 | OCHTET03 | 2691-41-0   | --                           | --                                 | --                                  | 280.3(Gao et al., 2014)    | DSC | 279(Gao et al., 2014)          |
| 32 | PUBMUU01 | 135285-90-4 | --                           | --                                 | --                                  | --                         | --  | --                             |
| 33 | PUBMUU07 | 135285-90-4 | --                           | --                                 | --                                  | 227.6(Gao et al., 2014)    | DSC | 252(decomp)(Gore et al., 2007) |
| 34 | PUBMUU12 | 135285-90-4 | 1454(●)(Meyer et al., 2007)  | 9.38(●)(Politzer and Murray, 2011) | 44.1(●)(Keshavarz, 2008)            | --                         | --  | --                             |
| 35 | TNBENZ12 | 99-35-4     | 947(○)(Keshavarz, 2005)      | 7.30(●)(Meyer et al., 2007)        | 21.9(●)(Kamlet and Dickinson, 1968) | 305.1(Zeman, 1980)         | DTA | 106(Kofler et al., 1948)       |
| 36 | ZZZMUC08 | 118-96-7    | 1290(●)(Headquarters, 1984)  | 6.93(●)(Keshavarz, 2008)           | 22.5(●)(Kamlet and Dickinson, 1968) | 225(10)(Hong et al., 2015) | DSC | 80.8(Šarlauskas, 2010)         |



|    |          |                    |                             |                                             |                                     |                                   |     |                                    |
|----|----------|--------------------|-----------------------------|---------------------------------------------|-------------------------------------|-----------------------------------|-----|------------------------------------|
| 37 | TNIOAN   | 489-98-5           | 858(○)(Keshavarz, 2007)     | 7.30(●)(Meyer et al., 2007)                 | 24.7(●)(Wang et al., 2006)          | 324.38(20)(Zeman, 1993)           | DSC | 188(Spencer et al., 1946)          |
| 38 | QAGBAB   | 96-91-3            | 639(○)(Keshavarz, 2007)     | --                                          | --                                  | 217(5)(Wurzenberger et al., 2020) | DTA | 169.9(Meyer et al., 2016)          |
| 39 | PICRAC12 | 88-89-1            | 1032(○)(Rice et al., 2002)  | 7.57(●)(Wang et al., 2006; Keshavarz, 2008) | 27.7(●)(Wang et al., 2006)          | 274(10)(Hong et al., 2015)        | DSC | 122(Srinivasan et al., 2006)       |
| 40 | SAWBUN   | 129-66-835860-50-5 | 947(○)(Keshavarz, 2005)     | --                                          | --                                  | 231(5)(Zeman, 2003)               | DTA | 228.7(decomp)(Fonger et al., 2014) |
| 41 | DATNBZ   | 1630-08-6          | 980(●)(Rice and Hare, 2002) | 7.52(●)(Politzer and Murray, 2011)          | 25.9(●)(Kamlet and Dickinson, 1968) | 358.96(20)(Zeman, 1993)           | DSC | 288(Siele et al., 1962)            |
| 42 | WEKGOJ   | 78013-51-1         | 1056(○)(Keshavarz, 2007)    | 7.47(○)(Meyer et al., 2007)                 | --                                  | 300(Licht and Ritter, 1988)       | DTA | 162(Licht and Ritter, 1988)        |
| 43 | GETFIU   | 4682-03-5          | --                          | 6.60(○)(Meyer et al., 2007)                 | --                                  | 157(5)(Fischer et al., 2016)      | DSC | --                                 |

|    |          |             |                             |                                    |                                     |                                  |     |                              |
|----|----------|-------------|-----------------------------|------------------------------------|-------------------------------------|----------------------------------|-----|------------------------------|
| 44 | TNPHT    | 4732-14-3   | 840(○)(Keshavarz, 2008)     | 6.50(●)(Meyer et al., 2007)        | --                                  | --                               | --  | 151(Leonard et al., 1956)    |
| 45 | MTNANL01 | 479-45-8    | 1450(●)(Headquarters, 1984) | 7.57(●)(Meyer et al., 2007)        | 26.3(●)(Kamlet and Dickinson, 1968) | 170(Lee et al., 1986)            | DSC | 131.5(Kim et al., 2018)      |
| 46 | HNIDPA   | 131-73-7    | 974(○)(Keshavarz, 2005)     | 7.20(○)(Meyer et al., 2007)        | 28.8(○)(Wang et al., 2006)          | 275(10)(Huang et al., 2011)      | DSC | 254(Huang et al., 2011)      |
| 47 | GIMBOT   | 20062-22-0  | 1360(●)(Headquarters, 1984) | 7.06(●)(Politzer and Murray, 2011) | 26.2(●)(Headquarters, 1984)         | 330(2.5)(Rieckmann et al., 2001) | DSC | 318(Klapötke et al., 2016)   |
| 48 | BAKLII   | 56140-58-0  | --                          | --                                 | --                                  | 275(Zhang et al., 2010)          | DSC | 270(Blanksma, 1908)          |
| 49 | DACYEL   | 97217-74-8  | --                          | --                                 | --                                  | --                               | --  | 240(Chaykovsky et al., 1990) |
| 50 | AFEPUX   | 134282-42-1 | --                          | --                                 | --                                  | 232.0(5)(Klapötke et al., 2016)  | DSC | --                           |
| 51 | TIBMUM   | 39771-28-3  | --                          | --                                 | --                                  | 321.6(10)(Li et al., 2003)       | DSC | --                           |
| 52 | IKIMIY   | 436848-40-7 | --                          | --                                 | --                                  | 160.0(Averkiv et al., 2002)      | --  | --                           |

|    |          |              |    |                            |                             |                                    |     |                                   |
|----|----------|--------------|----|----------------------------|-----------------------------|------------------------------------|-----|-----------------------------------|
| 53 | TIBMIA   | 132683-64-8  | -- | 7.9(●)(Du et al., 2013)    | 28.1(●)(Du et al., 2013)    | 350.7(10)(He et al., 2013)         | DSC | --                                |
| 54 | YEKQAG   | 194486-77-6  | -- | 7.99(●)(ZHAO et al., 2013) | 29.6(●)(ZHAO and LIU, 2013) | 345.3(5)(Wang et al., 2014)        | DSC | --                                |
| 55 | CIWMAW   | 52173-59-8   | -- | --                         | --                          | 302(Huang et al., 2019)            | DSC | 300(decomp)(Guillou et al., 2009) |
| 56 | KUBVAH   | 1246853-06-4 | -- | --                         | --                          | --                                 | --  | 211(Zaitsev et al., 2009)         |
| 57 | MOCJUK01 | 4433-16-3    | -- | --                         | --                          | 286(Yan et al., 2019)              | DSC | 242.0(Roháč et al., 2008)         |
| 58 | HIQBIV   | 131394-27-9  | -- | --                         | --                          | 365.0(5)(Kumar et al., 2018)       | DSC | 305.0(Kumar et al., 2018)         |
| 59 | PITGAD   | 2411964-98-0 | -- | --                         | --                          | 314.0(5)(Domasevitch et al., 2019) | DTA | 306.0(Domasevitch et al., 2019)   |
| 60 | DORYOA   | 1573131-04-0 | -- | --                         | --                          | 284(Li et al., 2014)               | DSC | 250(Li et al., 2014)              |
| 61 | PITGEH   | 175788-77-9  | -- | --                         | --                          | 298.0(5)(Domasevitch et al., 2019) | DTA | 292.0(Domasevitch et al., 2019)   |
| 62 | HIQBOB   | 1006545-77-2 | -- | --                         | --                          | 205.5(5)(Kumar et al., 2018)       | DSC | --                                |
| 63 | SEFVIL   | 2215034-55-0 | -- | --                         | --                          | 253.2(5)(Tang et al., 2017)        | DSC | 209.0(Tang et al., 2017)          |

|    |          |              |    |                          |    |                                   |     |                                   |
|----|----------|--------------|----|--------------------------|----|-----------------------------------|-----|-----------------------------------|
| 64 | BADRAC   | 1605347-16-7 | -- | --                       | -- | --                                | --  | 241.0(Yin et al., 2015)           |
| 65 | WACGOW   | 32255-27-9   | -- | 7.29(●)(Türker, 2012)    | -- | --                                | --  | 231.0(Terrier et al., 1990)       |
| 66 | GATFEP   | 2072820-21-2 | -- | --                       | -- | 310.0(5)(Fischer et al., 2016)    | DSC | --                                |
| 67 | GATFUF   | 2072820-20-1 | -- | --                       | -- | 205.0(5)(Fischer et al., 2016)    | DSC | --                                |
| 68 | KIQYUH   | NA           | -- | --                       | -- | 319.0(5)(Bölter et al., 2018)     | DSC | 156.0(Bölter et al., 2018)        |
| 69 | KIQNUW   | NA           | -- | --                       | -- | 330.0(5)(Bölter et al., 2018)     | DSC | 191.0(Bölter et al., 2018)        |
| 70 | YAHKID   | 5180-53-0    | -- | --                       | -- | 332.6(Huang et al., 2011)         | DSC | 220.0(Huang et al., 2011)         |
| 71 | JOTNOX   | 1644578-17-5 | -- | --                       | -- | 249.9(5)(Yin et al., 2014)        | DSC | 203.6(Yin et al., 2014)           |
| 72 | ONAVEF01 | 26670-16-6   | -- | --                       | -- | 266.0(5)(Yang et al., 2016)       | DSC | 250.0(Yang et al., 2016)          |
| 73 | MUKREQ   | 1198599-36-8 | -- | --                       | -- | 223.5(10)(Zeng et al., 2009)      | DSC | --                                |
| 74 | LUFXUH   | 1819967-31-1 | -- | --                       | -- | 405.0(10)(Liu et al., 2015)       | DSC | --                                |
| 75 | IBOPEW   | 33491-88-2   | -- | 7.33(●)(Keshavarz, 2007) | -- | 362.0(decomp)(Zeman et al., 2010) | --  | 362.0(decomp)(Zeman et al., 2010) |

|    |        |              |    |    |    |                                 |     |                           |
|----|--------|--------------|----|----|----|---------------------------------|-----|---------------------------|
| 76 | ZUQWIT | 133502-79-1  | -- | -- | -- | 299.0(5)(Wei et al., 2015)      | DSC | --                        |
| 77 | OSEWEQ | 38082-89-2   | -- | -- | -- | 360.0(5)(Klapötke et al., 2016) | DSC | 360(Fried, 1998)          |
| 78 | OTIBAW | 55148-03-3   | -- | -- | -- | 369.5(10)(Zhang et al., 2017)   | DSC | --                        |
| 79 | LEGYII | 2134229-83-5 | -- | -- | -- | 261.2(5)(Yin et al., 2017)      | DSC | --                        |
| 80 | GEYRAG | 293324-58-0  | -- | -- | -- | 307.0(5)(Tang et al., 2018)     | DSC | 304.0(Tang et al., 2018)  |
| 81 | GEYQUZ | NA           | -- | -- | -- | 280.0(5)(Tang et al., 2018)     | DSC | 278.0(Tang et al., 2018)  |
| 82 | LEGYAA | 2134229-85-7 | -- | -- | -- | 307.2(5)(Yin et al., 2017)      | DSC | --                        |
| 83 | GEYREK | NA           | -- | -- | -- | 328.0(5)(Tang et al., 2018)     | DSC | 325.0(Tang et al., 2018)  |
| 84 | KUBVEL | NA           | -- | -- | -- | 351.0(5)(Li et al., 2019)       | DSC | --                        |
| 85 | KUBVOV | NA           | -- | -- | -- | 261.9(5)(Li et al., 2019)       | DSC | --                        |
| 86 | HEVRUV | 517-25-9     | -- | -- | -- | 128(Saraf et al., 2003)         | DSC | 15.4(Goebel et al., 2006) |
| 87 | AWAKIT | 14435-92-8   | -- | -- | -- | 400(Li et al., 2015)            | --  | --                        |

|     |          |              |    |    |    |                              |     |                             |
|-----|----------|--------------|----|----|----|------------------------------|-----|-----------------------------|
| 88  | AZCYHO   | 24824-15-5   | -- | -- | -- | --                           |     | --                          |
| 89  | BIZKOM01 | 1564257-34-6 | -- | -- | -- | 124(Kettner et al., 2014)    | DSC | --                          |
| 90  | CAZCEN   | 125363-08-8  | -- | -- | -- | --                           | --  | --                          |
| 91  | CIHQIT   | 155438-10-1  |    |    |    | --                           | --  | 56(Qu et al., 2018)         |
| 92  | CUGDIR   | 99393-63-2   | -- | -- | -- | 200(Zhang et al., 2002)      | DSC | >200(Wikipedia, 2006)       |
| 93  | DIXDET   | 268748-97-6  | -- | -- | -- | --                           | --  | --                          |
| 94  | DIXFEV   | 137538-62-6  | -- | -- | -- | --                           | --  | --                          |
| 95  | EJEGIJ   | 155438-13-4  | -- | -- | -- | 300(Sinditskii et al., 2016) | --  | --                          |
| 96  | EJEGOP   | 260963-78-8  | -- | -- | -- | --                           | --  | --                          |
| 97  | EJEGUV   | 155438-14-5  | -- | -- | -- | --                           | --  | 70(Sheremetev et al., 1998) |
| 98  | EJEHAC   | 612518-65-7  | -- | -- | -- | --                           | --  | 147(Averkiev et al., 2003)  |
| 99  | FEPVON   | 1415050-06-4 | -- | -- | -- | 176(Chavez et al., 2012)     | DSC | 124(Chavez et al., 2012)    |
| 100 | FORMOQ   | 1638095-71-2 | -- | -- | -- | 140(Fischer et al., 2014)    | DSC | --                          |
| 101 | GEPRAU   | 210626-81-6  | -- | -- | -- | --                           | --  | --                          |

|     |          |             |                            |                              |                              |                                   |     |                                   |
|-----|----------|-------------|----------------------------|------------------------------|------------------------------|-----------------------------------|-----|-----------------------------------|
| 102 | LITSIQ   | 292856-78-1 | --                         | --                           | --                           | --                                | --  | --                                |
| 103 | NIYDUU   | 206446-59-5 | --                         | --                           | --                           | 149.9(10)(Liu et al., 2015)       | DSC | 97.4(Liu et al., 2015)            |
| 104 | OXAYES   | 162111-36-6 | --                         | --                           | --                           | 212(Veauthier et al., 2010)       | DSC | 127(Veauthier et al., 2010)       |
| 105 | QQQBRD02 | 918-37-6    | 689(●)(Meyer et al., 2007) | 7.58(●)(Pepkin et al., 2011) | 23.6(●)(Pepkin et al., 2011) | 136.1(Huang et al., 2015)         | DSC | 150(Wikipedia, 2006)              |
| 106 | RABSUE   | 157628-84-7 | --                         | --                           | --                           | 220(decomp)(Makhova et al., 2003) | --  | 220(decomp)(Makhova et al., 2003) |
| 107 | RABTAL   | 155438-27-0 | --                         | --                           | --                           | --                                | --  | --                                |
| 108 | RAVSOW   | 33406-97-2  | --                         | --                           | --                           | --                                | --  | --                                |
| 109 | REQYIW   | 174092-36-5 | --                         | --                           | --                           | --                                | --  | 235(Sheremetev et al., 1996)      |
| 110 | SEJHEU   | 162111-38-8 | --                         | --                           | --                           | 232.23(Li et al., 2009)           | DSC | 230(Li et al., 2009)              |
| 111 | TIBKAQ   | 155438-28-1 | --                         | --                           | --                           | --                                | --  | --                                |
| 112 | TIBKEU   | 178043-06-6 | --                         | --                           | --                           | --                                | --  | --                                |
| 113 | TIZMAQ   | 152845-81-3 | --                         | --                           | --                           | 190(Sinditskii et al., 2016)      | --  | 63(Sheremetev et al., 1998)       |
| 114 | UBAWUR   | 371227-83-7 | --                         | --                           | --                           | 148(Leonard et al., 2011)         | DSC | 99(Leonard et al., 2011)          |

|     |          |              |                              |                            |                              |                               |     |                              |
|-----|----------|--------------|------------------------------|----------------------------|------------------------------|-------------------------------|-----|------------------------------|
| 115 | UHAMAR   | 152845-82-4  | --                           | --                         | --                           | --                            | --  | 112(Sheremetev et al., 1998) |
| 116 | UHOYIB   | 155256-96-5  | --                           | --                         | --                           | --                            | --  | 103(Sheremetev et al., 2015) |
| 117 | ZULDOZ   | 17557-81-2   | --                           | --                         | --                           | --                            | --  | 40(Ulpiani, 1912)            |
| 118 | HNOBEN   | 15834-75-0   | 1650(●)(Rice and Hare, 2002) | 9.30(●)(Keshavarz, 2008)   | 42.1(●)(Dong and Zhou, 1989) | 261.9(Zeman, 1980)            | DTA | 240(Nielsen et al., 1979)    |
| 119 | FEYMEC   | 29306-57-8   | --                           | --                         | --                           | --                            | --  | 131(Manelis et al., 2006)    |
| 120 | BZOFOX   | 3470-17-5    | 1410(●)(Dong and Zhou, 1989) | 8.26(●)(Keshavarz, 2008)   | 35.1(○)(Aksent, 1989)        | 289(10)(Yang et al., 2012)    | DSC | 193(Ohta et al., 1963)       |
| 121 | AFUGEP   | 782438-60-2  | --                           | 8.68(●)(Tian et al., 2011) | 36.1(●)(Tian et al., 2011)   | 186.0(10)(Zhang et al., 2014) | DSC | 82.6(Zhang et al., 2014)     |
| 122 | XERPAM   | 371951-09-6  | 1383.6(●)(Zhou et al., 2011) | 8.93(●)(Zhou et al., 2011) | --                           | 272.0(5)(LI et al., 2016)     | DSC | 109.0(LI et al., 2016)       |
| 123 | BADNAY01 | 1809272-88-5 | --                           | --                         | --                           | 138.0(Terrier et al., 1990)   | --  | --                           |



|     |          |              |    |    |    |                                        |     |                                   |
|-----|----------|--------------|----|----|----|----------------------------------------|-----|-----------------------------------|
| 124 | SEFVOR   | 2195346-95-1 | -- | -- | -- | 233.1(5)(Tang et al., 2017)            | DSC | 205.5(Tang et al., 2017)          |
| 125 | PUBMII01 | 189192-28-7  | -- | -- | -- | ><br>195(decomp)(Meyer et al., 2016)   | --  | > 195(decomp)(Meyer et al., 2016) |
| 126 | DEDBUJ   | 98686-54-5   | -- | -- | -- | --                                     | --  | --                                |
| 127 | HIQBER   | 152678-74-5  | -- | -- | -- | 243.0(5)(Kumar et al., 2018)           | DSC | 209.0(Kumar et al., 2018)         |
| 128 | VETWAS   | 131394-26-8  | -- | -- | -- | 290.0(5)(Liu et al., 2015)             | DSC | --                                |
| 129 | DAZDUF   | 134293-22-4  | -- | -- | -- | 214.0(5)(Fischer et al., 2012)         | DSC | --                                |
| 130 | FIHPIY   | 2243211-28-9 | -- | -- | -- | 228.0(5)(Tang et al., 2018)            | DSC | --                                |
| 131 | KUBVIP   | NA           | -- | -- | -- | 340.8(5)(Li et al., 2019)              | DSC | --                                |
| 132 | FOXHIM   | 131846-99-6  | -- | -- | -- | 329(5)(Zhang et al., 2019)             | DSC | --                                |
| 133 | OYAVIV   | 2095393-79-4 | -- | -- | -- | 335.0(5)(Klapötke and Witkowski, 2016) | DSC | --                                |
| 134 | ZASWEX   | 2387677-24-7 | -- | -- | -- | --                                     | --  | --                                |
| 135 | ZASWAT   | 2387677-23-6 | -- | -- | -- | --                                     | --  | --                                |

|     |        |              |    |    |    |                                               |     |                                  |
|-----|--------|--------------|----|----|----|-----------------------------------------------|-----|----------------------------------|
| 136 | CUJFAQ | 1801269-93-1 | -- | -- | -- | 302.0(5)(Klapötk<br>e and Witkowski,<br>2016) | DSC | --                               |
| 137 | GEYQOT | NA           | -- | -- | -- | 261.0(5)(Tang et<br>al., 2018)                | DSC | 233.0(Tang et al.,<br>2018)      |
| 138 | MUKRAM | 1198599-46-0 | -- | -- | -- | 298.3(10)(Zeng et<br>al., 2009)               | DSC |                                  |
| 139 | FOYSUJ | NA           | -- | -- | -- | 197.9(Wu et al.,<br>2015)                     | DSC | 156.6(Wu et al., 2015)           |
| 140 | CUDQUP | 29754-26-5   | -- | -- | -- | 260(10)(Hong et<br>al., 2015)                 | DSC | 67(10)(Hong et al.,<br>2015)     |
| 141 | GEXMON | 1418127-35-1 | -- | -- | -- | --                                            | --  | 171.3(10)(Zhang et al.,<br>2013) |
| 142 | GEXMIH | 1418127-36-2 | -- | -- | -- | --                                            | --  | 205.8(10)(Zhang et al.,<br>2013) |
| 143 | GEXMAZ | 1418127-37-3 | -- | -- | -- | --                                            | --  | 132.6(10)(Zhang et al.,<br>2013) |
| 144 | GEXMED | 1418127-38-4 | -- | -- | -- | --                                            | --  | 189.0(10)(Zhang et al.,<br>2013) |
| 145 | ZEVNUL | NA           | -- | -- | -- | --                                            | --  | 164.5(10)(Zhang et al.,<br>2013) |
| 146 | PEHSUS | 2309306-47-4 | -- | -- | -- | 235(10)(Yang et<br>al., 2012)                 | DSC | 220(Yang et al., 2012)           |
| 147 | TOZMUS | NA           | -- | -- | -- | 240(10)(Hong et<br>al., 2015)                 | DSC | 62(10)(Hong et al.,<br>2015)     |

|     |          |              |    |    |    |                              |     |                                   |
|-----|----------|--------------|----|----|----|------------------------------|-----|-----------------------------------|
| 148 | IZUZUZ   | 1583315-32-5 | -- | -- | -- | 207(10)(Bolton et al., 2011) | DSC | 136(10)(Bolton and Matzger, 2011) |
| 149 | TIVJUF   | 2387677-27-0 | -- | -- | -- | 216.8(10)(Wang et al., 2014) | DSC | 136.7(10)(Wang et al., 2014)      |
| 150 | QISTAN01 | 250165-39-0  | -- | -- | -- | --                           | --  | --                                |
| 151 | GOWHIL   | NA           | -- | -- | -- | 220(10)(Yang et al., 2014)   | DSC | 91(10)(Yang et al., 2014)         |
| 152 | ZEBJOH   | 1668570-32-8 | -- | -- | -- | 243.5(10)(Gao et al., 2014)  | DSC | -                                 |
| 153 | FIHPEU   | 2243696-54-8 | -- | -- | -- | 315.1(5)(Tang et al., 2018)  | DSC | --                                |

**Table S4. Feature importance ranking by the magnitude of Pearson correlation coefficients. (Related to Figure 5)**

| Label | Feature                            | <i>Importance to <math>Q_{max}</math></i> | Feature                         | <i>Importance to <math>D</math></i> | Feature                         | <i>Importance to <math>p_{C-I}</math></i> | Feature                  | <i>Importance to <math>T_d</math></i> | Feature                                    | <i>Importance to <math>LE</math></i> |
|-------|------------------------------------|-------------------------------------------|---------------------------------|-------------------------------------|---------------------------------|-------------------------------------------|--------------------------|---------------------------------------|--------------------------------------------|--------------------------------------|
| 1     | Product gaseous CO <sub>2</sub>    | 0.610                                     | Product solid C                 | -0.813                              | Product solid C                 | -0.820                                    | Oxygen balance           | -0.430                                | Incrystal mix with hydrogen-rich molecules | 0.698                                |
| 2     | HB strength                        | -0.597                                    | Oxygen balance                  | 0.806                               | Oxygen balance                  | 0.803                                     | HB amount                | 0.390                                 | HB strength                                | 0.603                                |
| 3     | Functional group - NH <sub>2</sub> | -0.472                                    | Material density                | 0.748                               | Material density                | 0.794                                     | Weakest bond strength    | 0.378                                 | HB amount                                  | 0.564                                |
| 4     | Product gaseous H <sub>2</sub> O   | -0.378                                    | Product gaseous CO <sub>2</sub> | 0.691                               | Product gaseous CO <sub>2</sub> | 0.700                                     | HB length                | 0.287                                 | Incrystal mix with energetic molecules     | 0.536                                |
| 5     | Product gaseous O <sub>2</sub>     | -0.367                                    | Product gaseous N <sub>2</sub>  | 0.544                               | Product gaseous N <sub>2</sub>  | 0.549                                     | Molecular weight         | 0.227                                 | HB length                                  | 0.308                                |
| 6     | HB amount                          | -0.324                                    | Crystal packing coefficient     | 0.362                               | Crystal packing coefficient     | 0.407                                     | Number of molecules in a | -0.219                                | Material density                           | -0.288                               |

|    |                                 |        |                                        |        |                                        |        |                                   |        |                                   |        |
|----|---------------------------------|--------|----------------------------------------|--------|----------------------------------------|--------|-----------------------------------|--------|-----------------------------------|--------|
|    |                                 |        |                                        |        |                                        |        | primitive cell                    |        |                                   |        |
| 7  | Crystal packing type            | 0.307  | Nitrogen density                       | 0.290  | Nitrogen density                       | 0.301  | Material density                  | -0.217 | Molecular weight                  | 0.274  |
| 8  | Product gaseous NH <sub>3</sub> | -0.300 | Product gaseous NH <sub>3</sub>        | -0.281 | HB amount                              | -0.265 | Crystal packing type              | -0.194 | Oxygen balance                    | -0.272 |
| 9  | HB length                       | -0.267 | HB amount                              | -0.260 | Functional group -NO <sub>2</sub>      | 0.260  | Functional group -NH <sub>2</sub> | 0.191  | Weakest bond strength             | 0.245  |
| 10 | Molecular weight                | 0.251  | Incrystal mix with energetic molecules | -0.259 | Incrystal mix with energetic molecules | -0.254 | HB strength                       | 0.190  | Weakest bond type                 | -0.198 |
| 11 | Oxygen balance                  | 0.201  | HB strength                            | -0.243 | Product gaseous NH <sub>3</sub>        | -0.254 | Weakest bond length               | 0.189  | Molecular backbone                | 0.183  |
| 12 | Product gaseous N <sub>2</sub>  | 0.193  | Functional group -NO <sub>2</sub>      | 0.238  | HB strength                            | -0.226 | Functional group -N <sub>3</sub>  | 0.185  | Functional group -NH <sub>2</sub> | 0.148  |

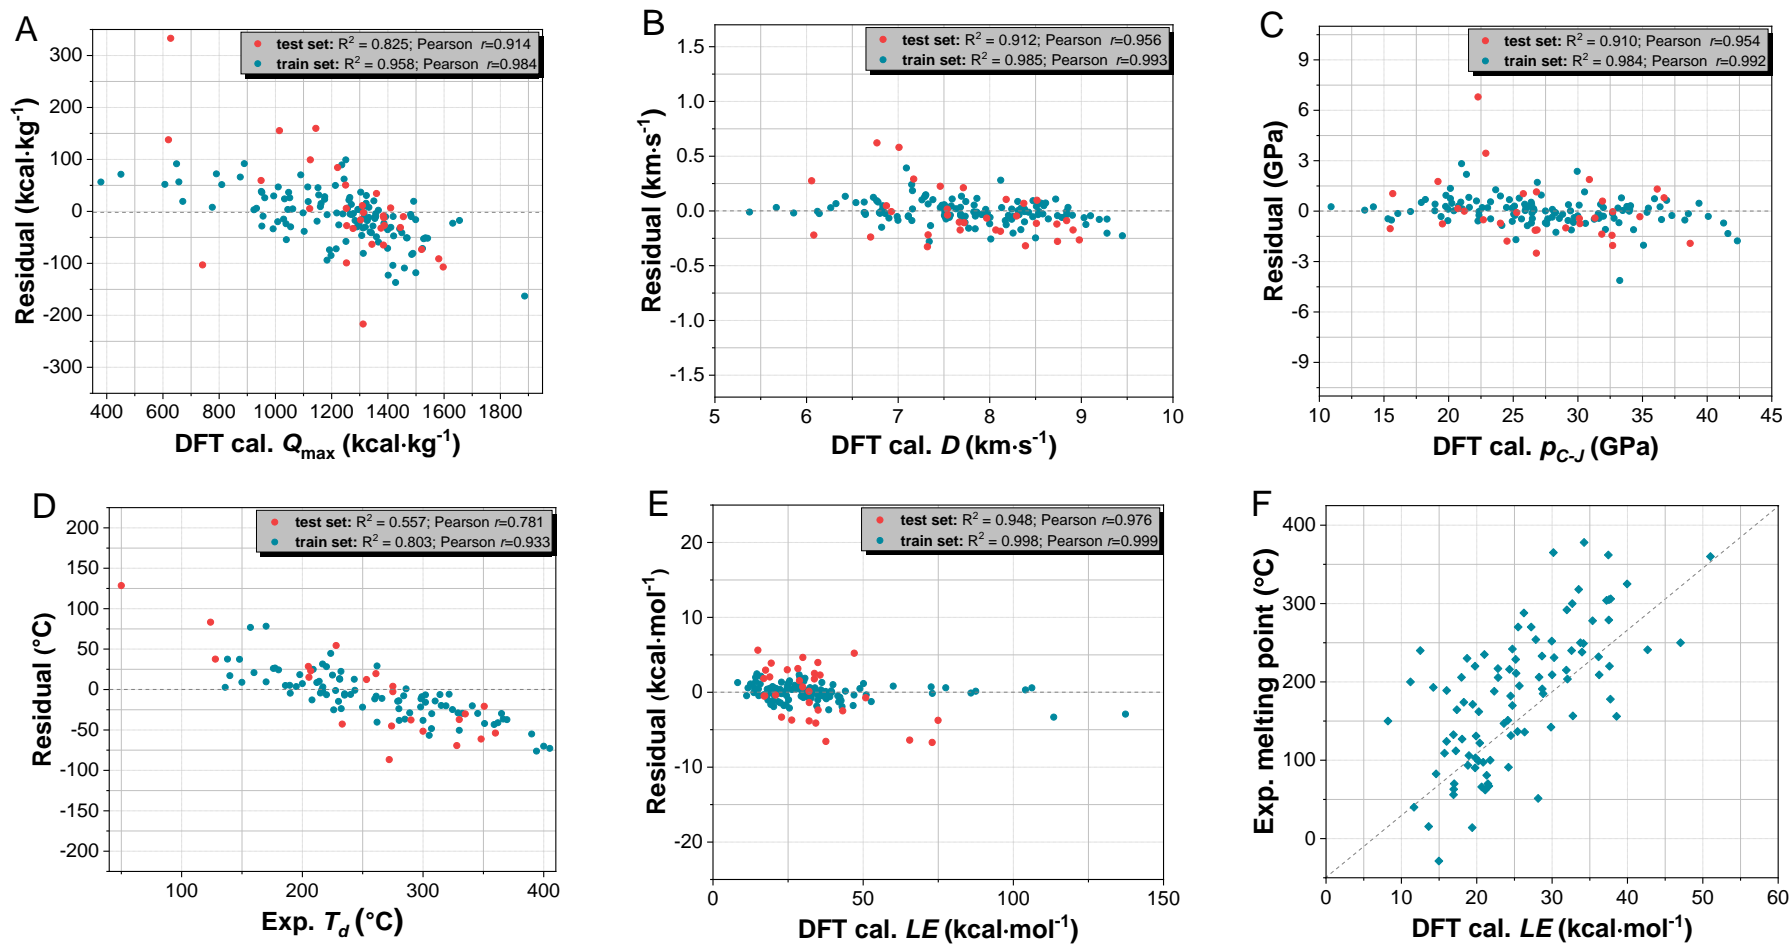

**Figure S1. XGBoost prediction residuals for (A)  $Q_{max}$ , (B)  $D$ , (C)  $p_{C-J}$ , (D)  $T_d$ , and (E)  $LE$ . (F) Roughly positive correlation of melting temperature to  $LE$ . (Related to Table 1 and Figure 4)**

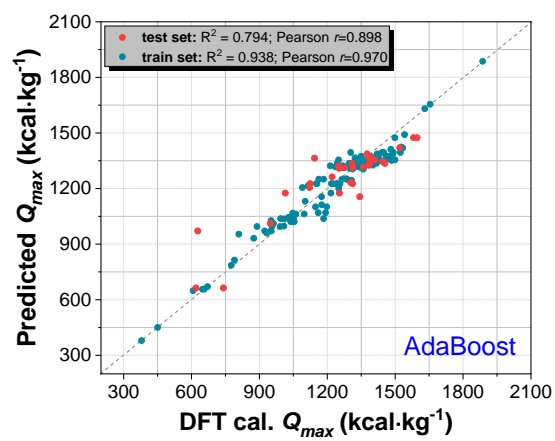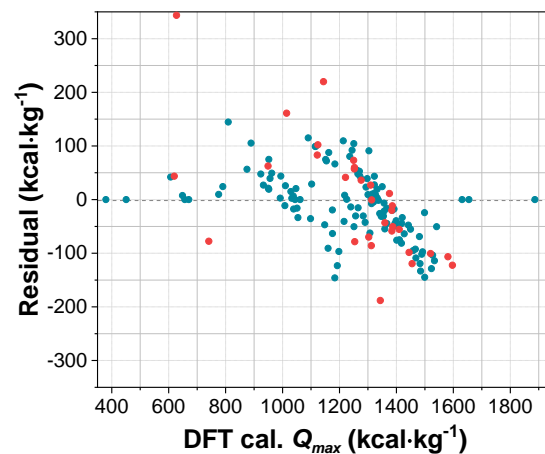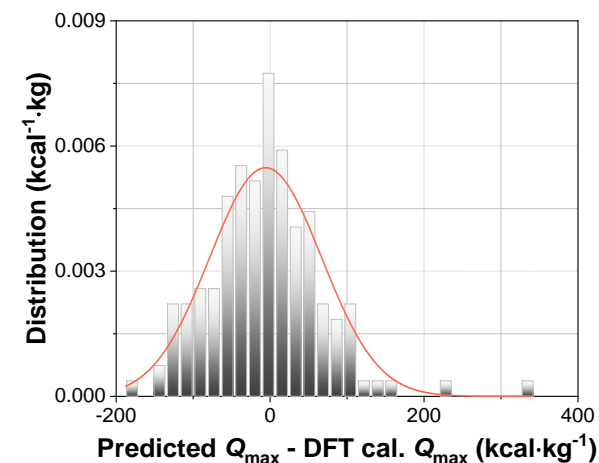

**Figure S2. Prediction of heat of explosion with AdaBoost model. (Related to Table 1)**

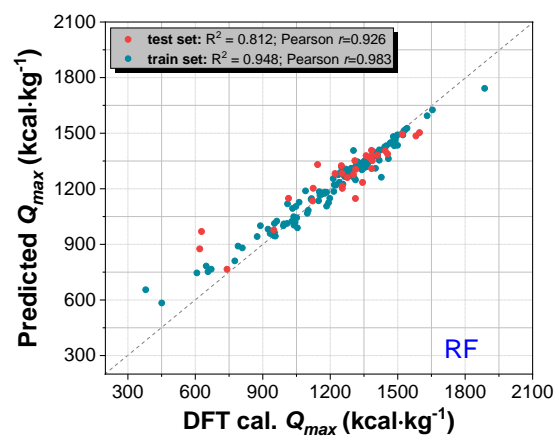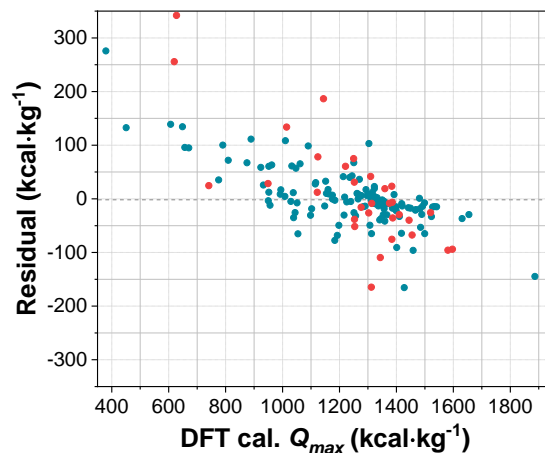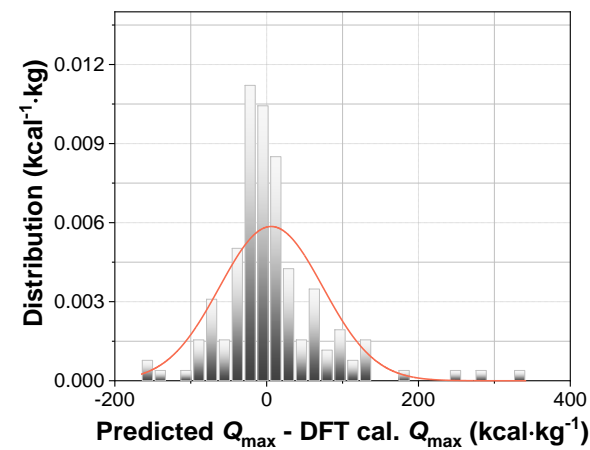

**Figure S3. Prediction of heat of explosion with RF model. (Related to Table 1)**

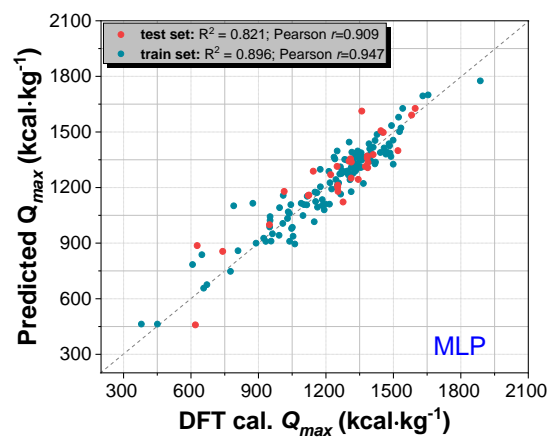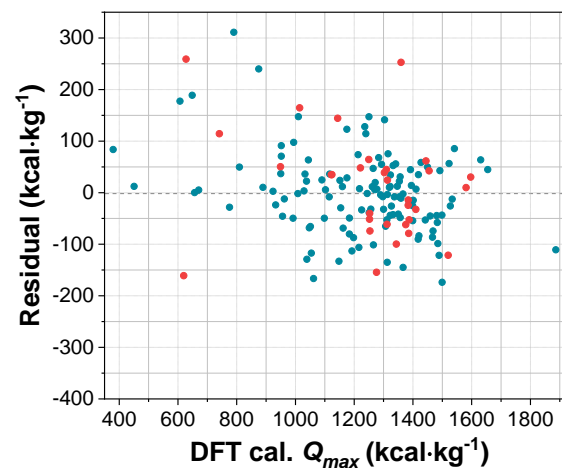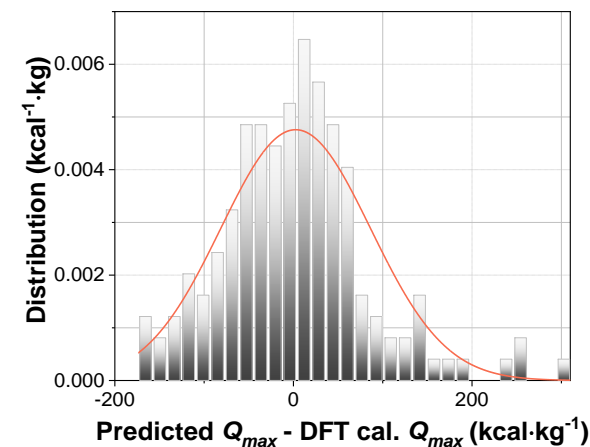

Figure S4. Prediction of heat of explosion with MLP model. (Related to Table 1)

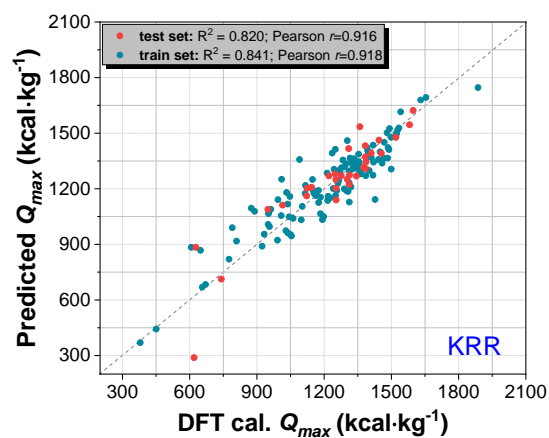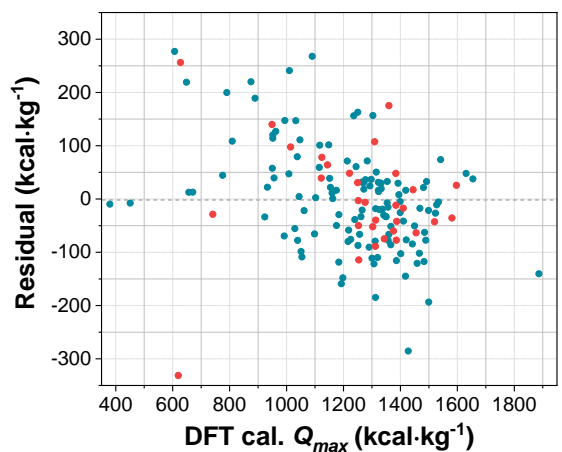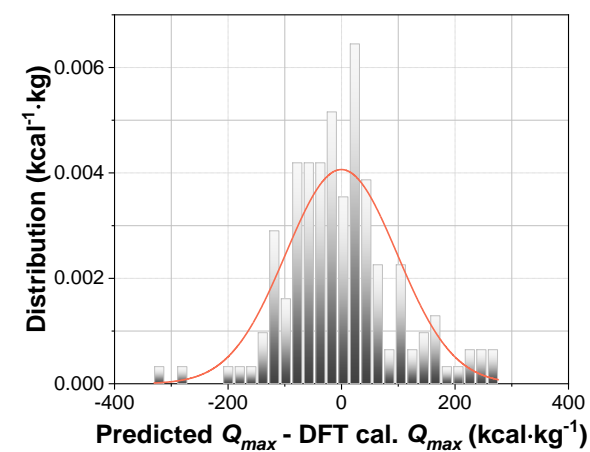

Figure S5. Prediction of heat of explosion with KRR model. (Related to Table 1)



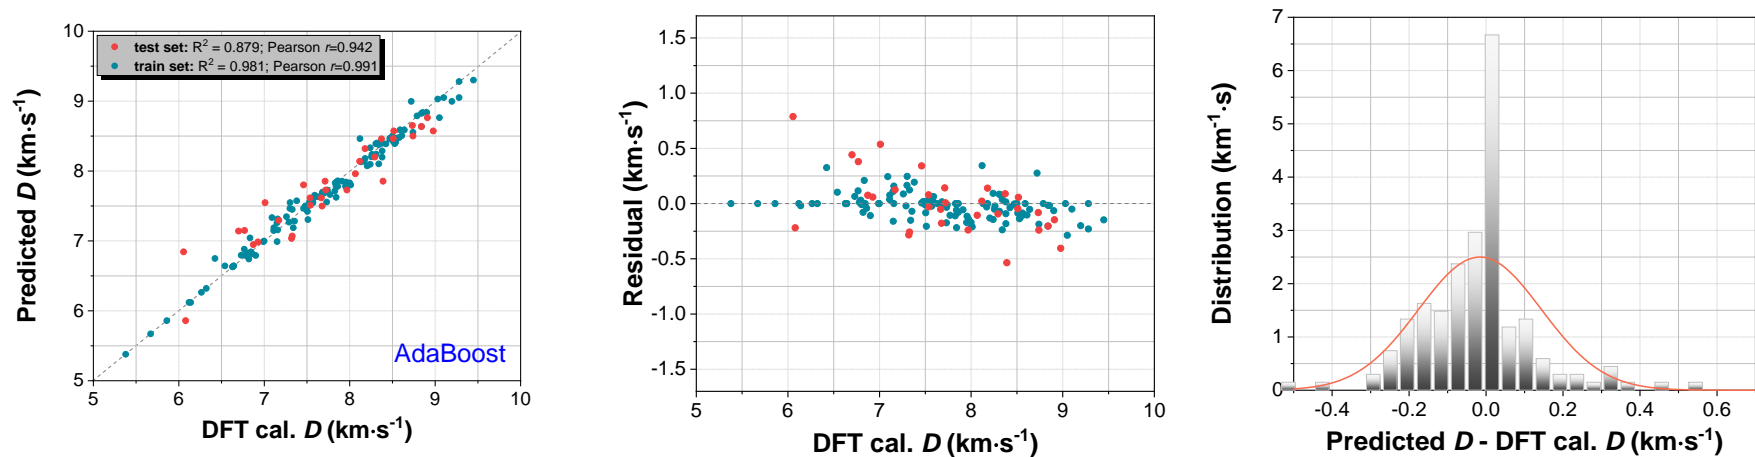

Figure S6. Prediction of detonation velocity with AdaBoost model. (Related to Table 1)

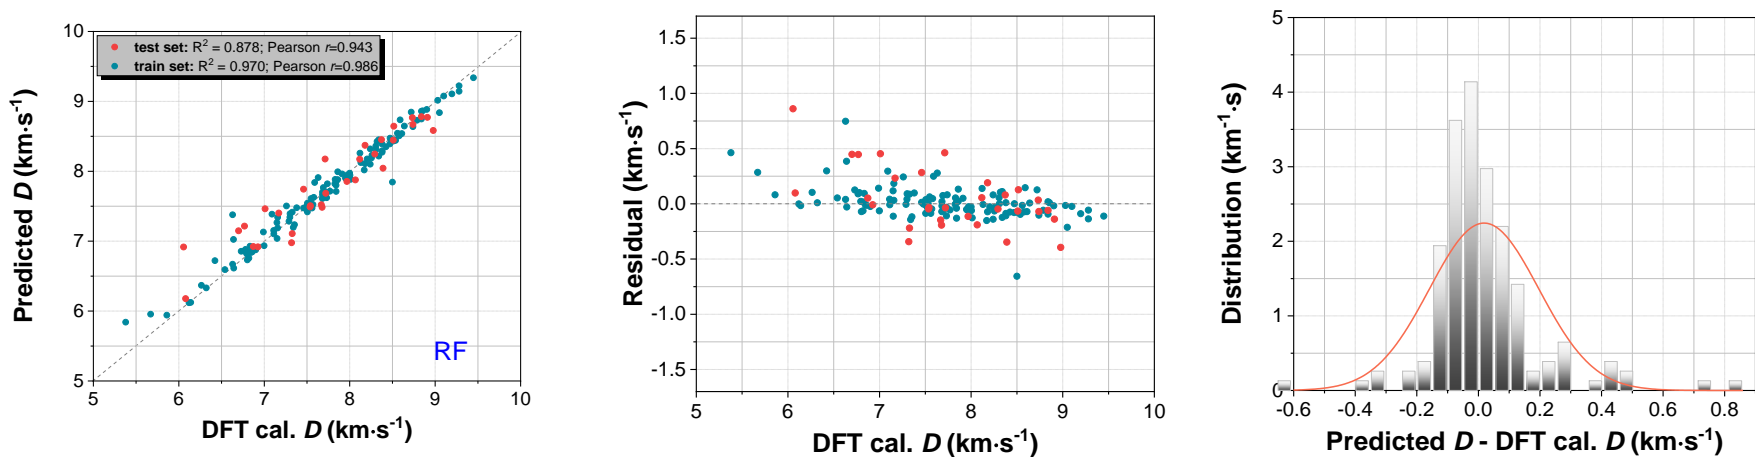

Figure S7. Prediction of detonation velocity with RF model. (Related to Table 1)

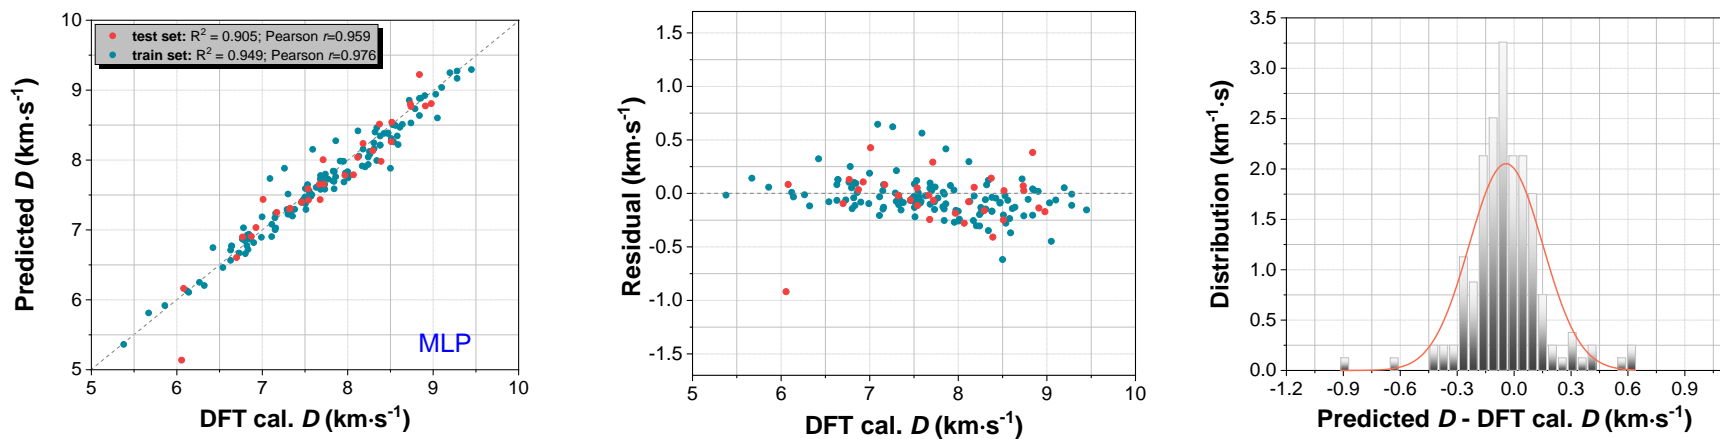

Figure S8. Prediction of detonation velocity with MLP model. (Related to Table 1)

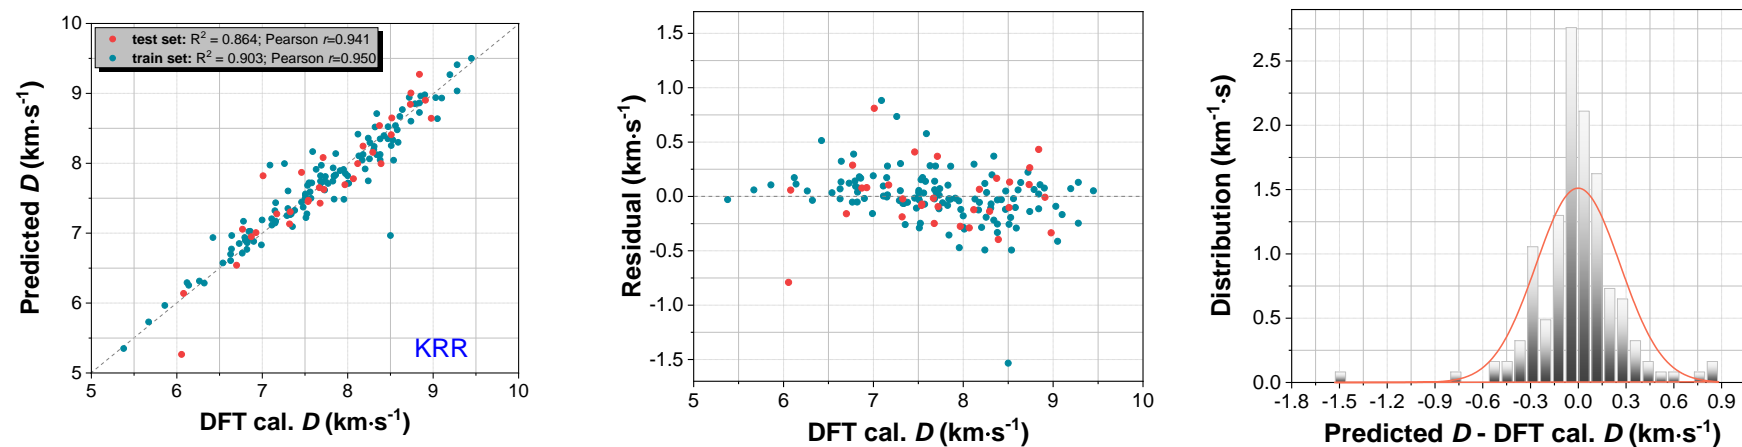

Figure S9. Prediction of detonation velocity with KRR model. (Related to Table 1)

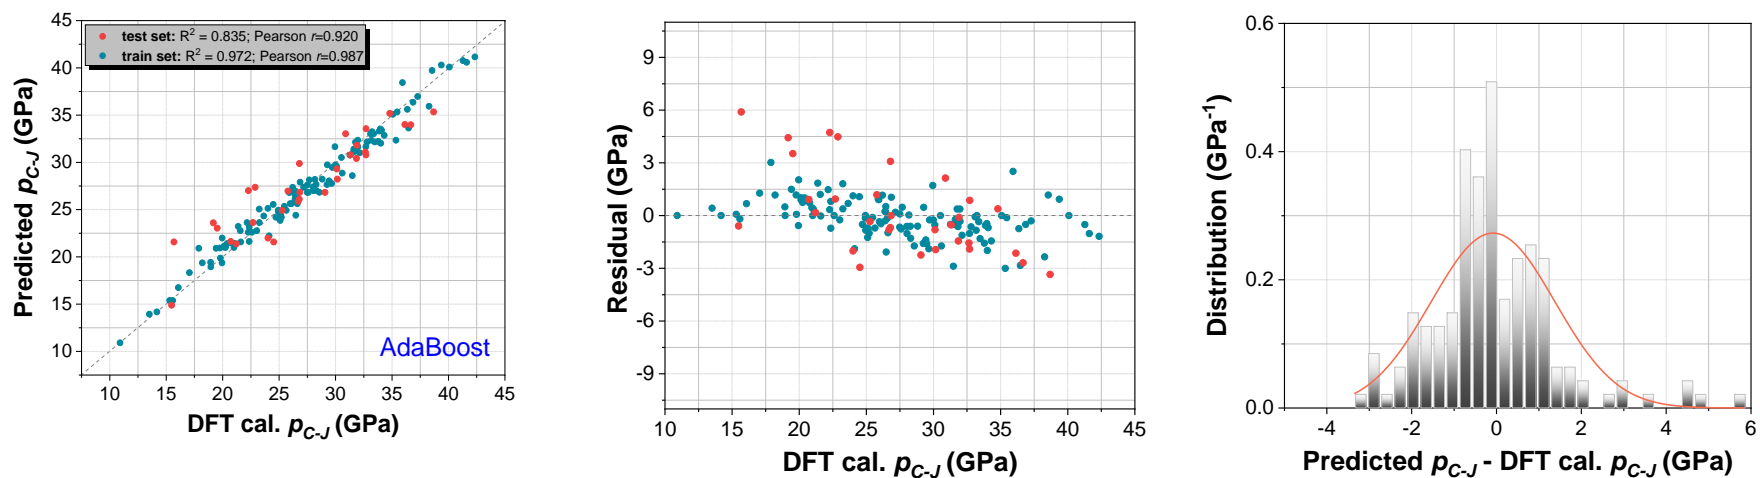

Figure S10. Prediction of detonation pressure with AdaBoost model. (Related to Table 1)

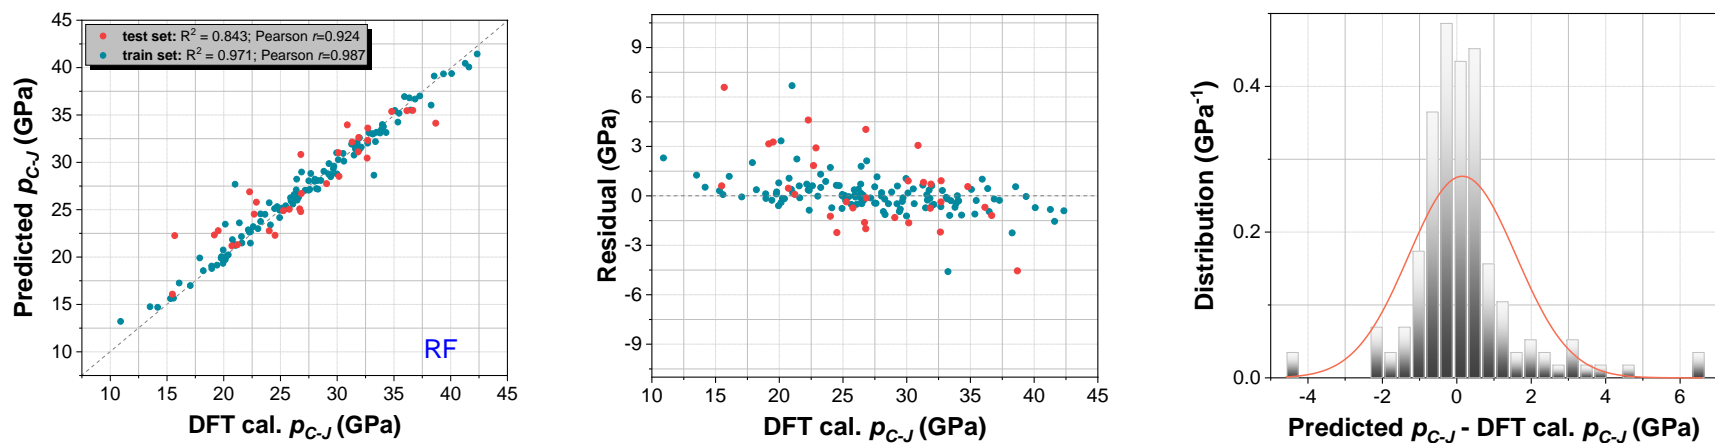

Figure S11. Prediction of detonation pressure with RF model. (Related to Table 1)

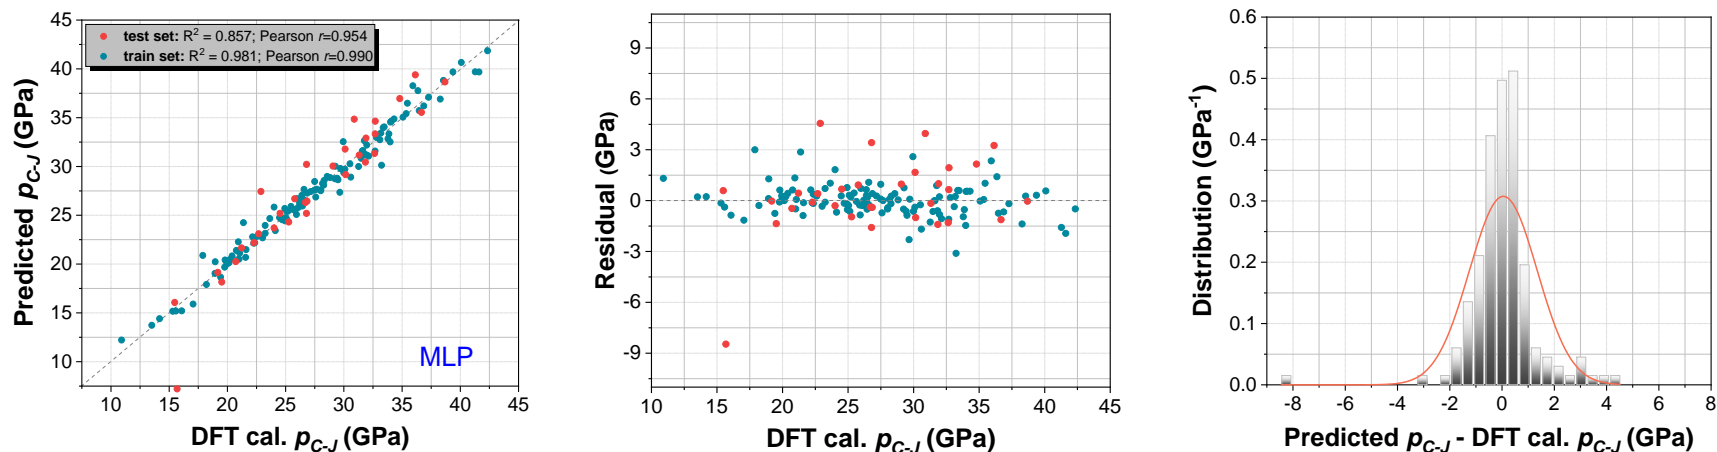

Figure S12. Prediction of detonation pressure with MLP model. (Related to Table 1)

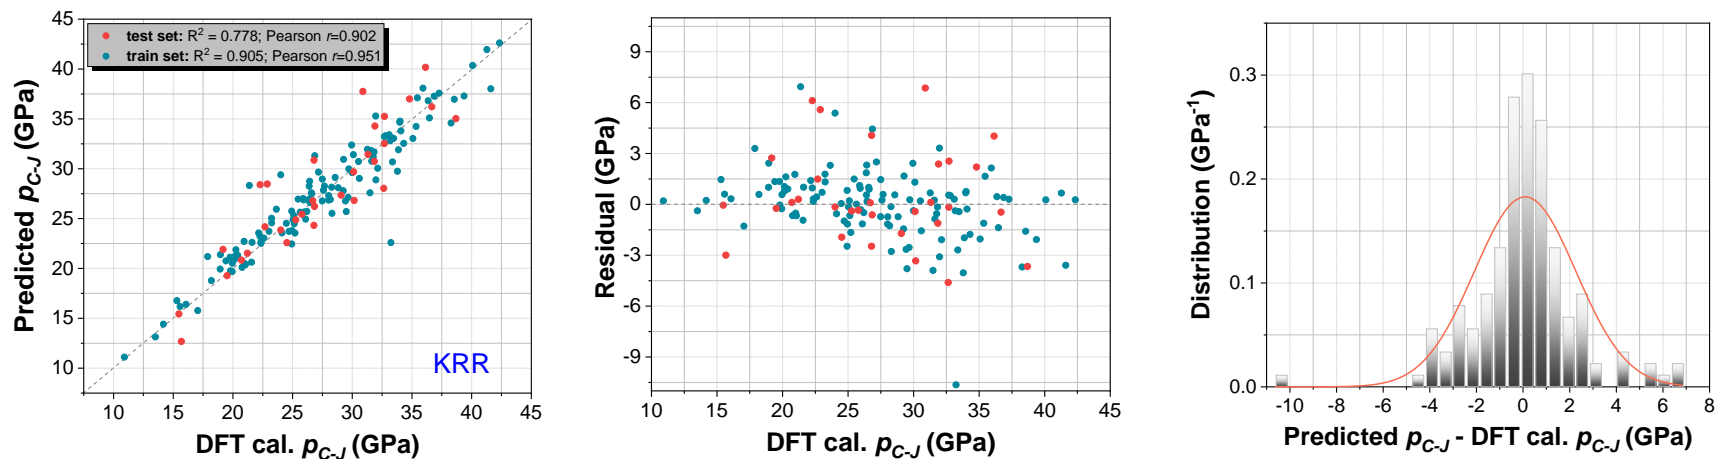

Figure S13. Prediction of detonation pressure with KRR model. (Related to Table 1)

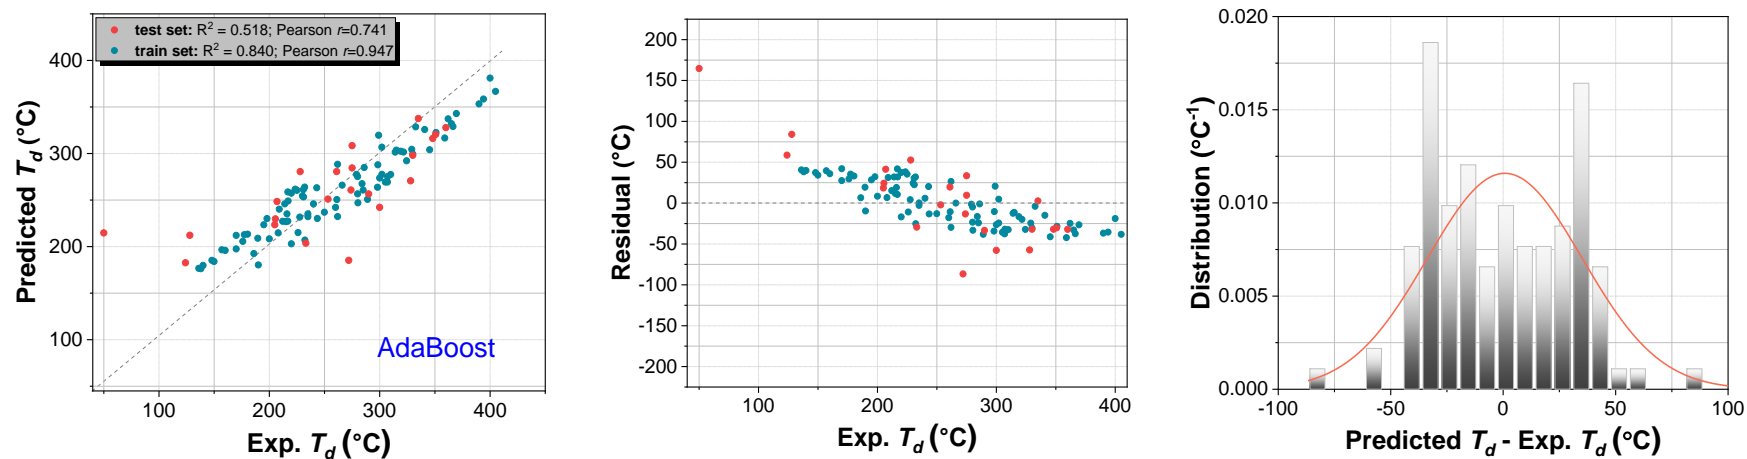

Figure S14. Prediction of decomposition temperature with AdaBoost model. (Related to Table 1)

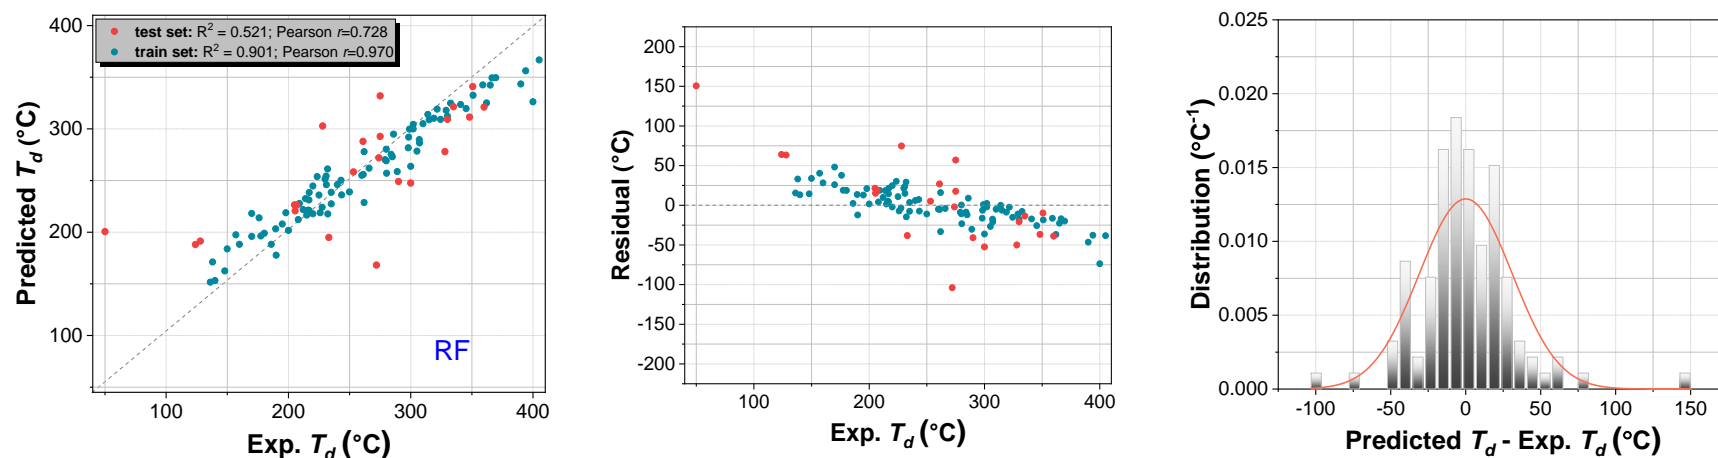

Figure S15. Prediction of decomposition temperature with RF model. (Related to Table 1)

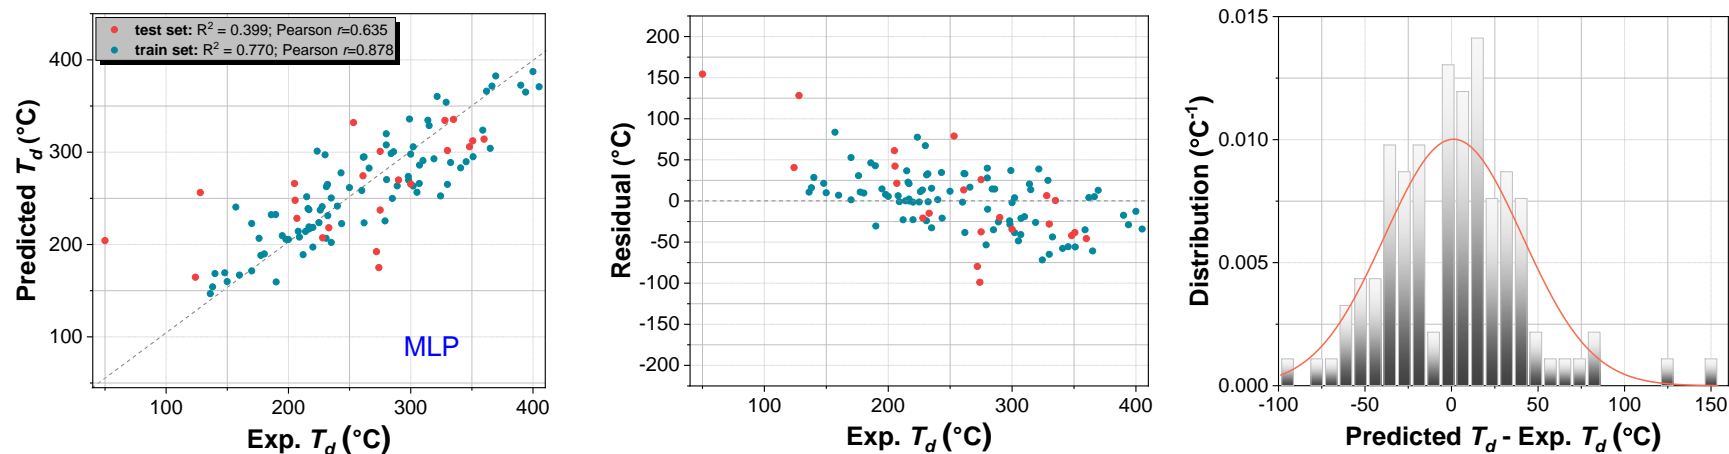

Figure S16. Prediction of decomposition temperature with MLP model. (Related to Table 1)

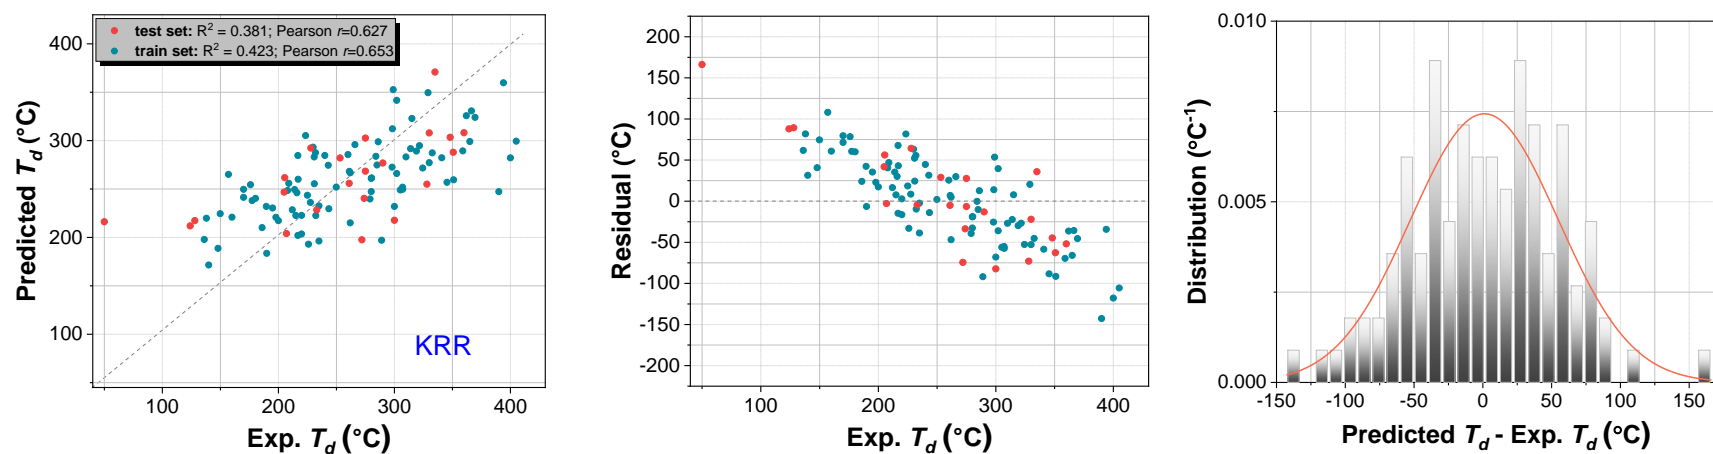

Figure S17. Prediction of decomposition temperature with KRR model. (Related to Table 1)

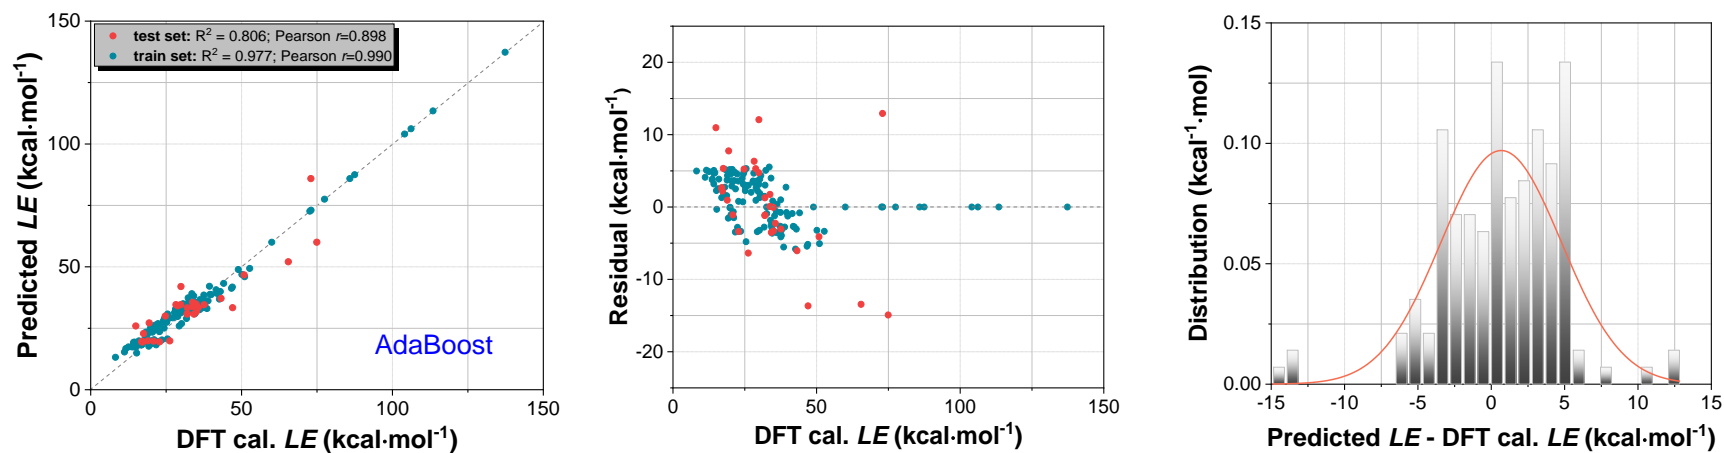

Figure S18. Prediction of lattice energy with AdaBoost model. (Related to Table 1)

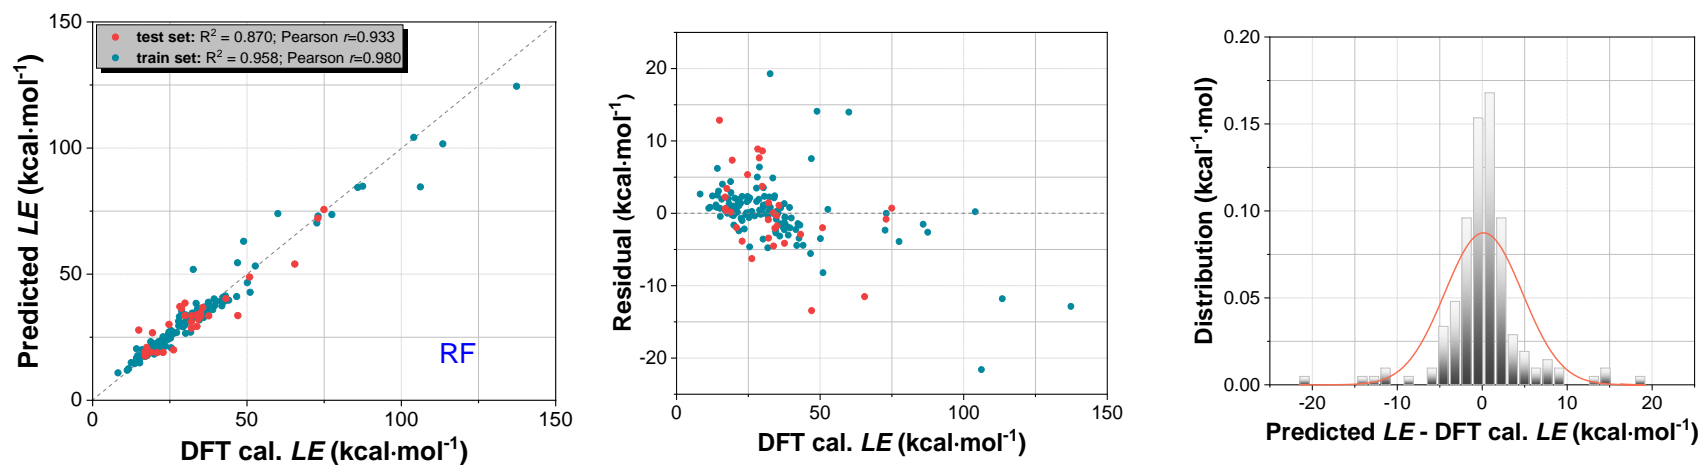

Figure S19. Prediction of lattice energy with RF model. (Related to Table 1)

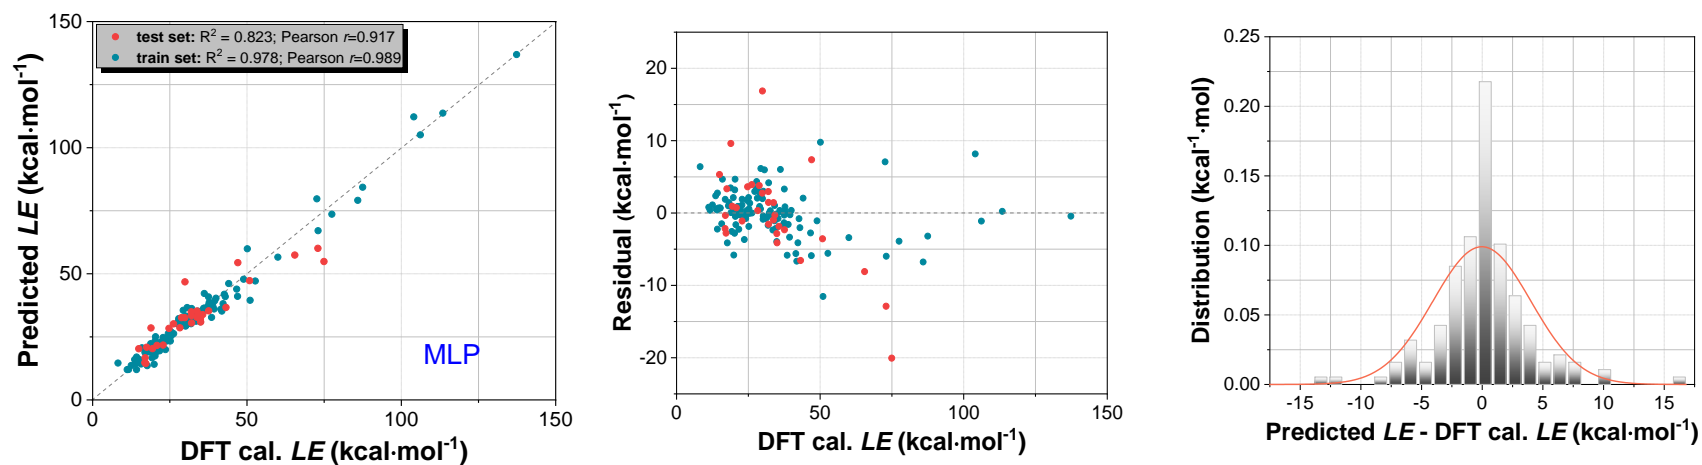

Figure S20. Prediction of lattice energy with MLP model. (Related to Table 1)

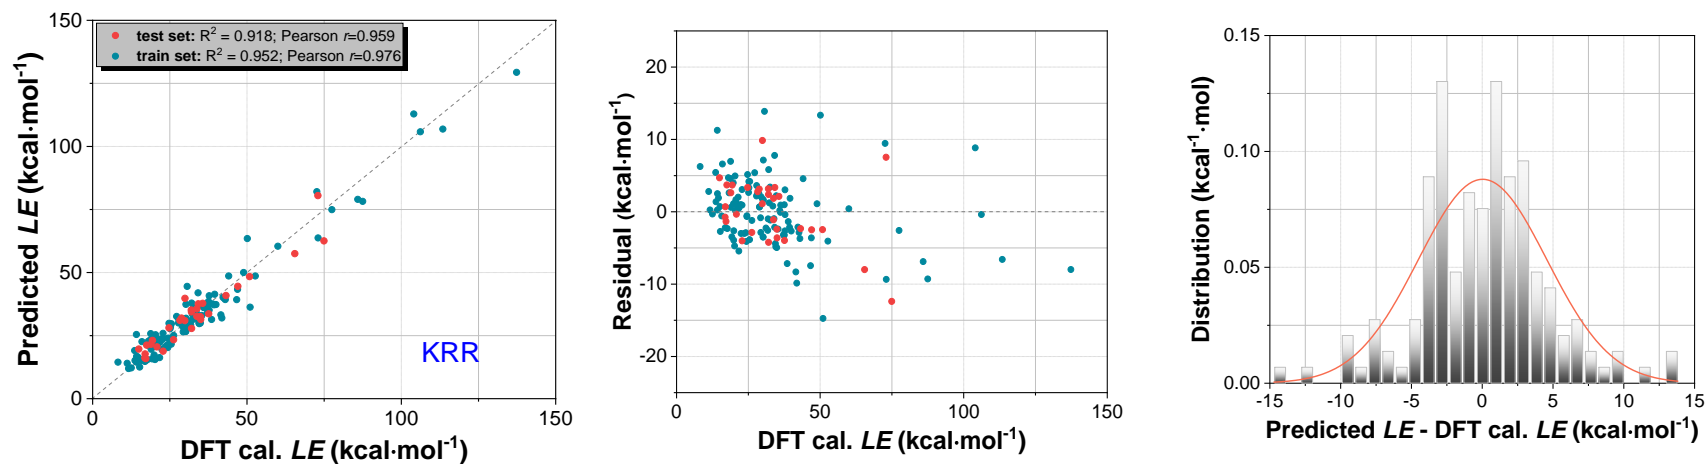

Figure S21. Prediction of lattice energy with KRR model. (Related to Table 1)



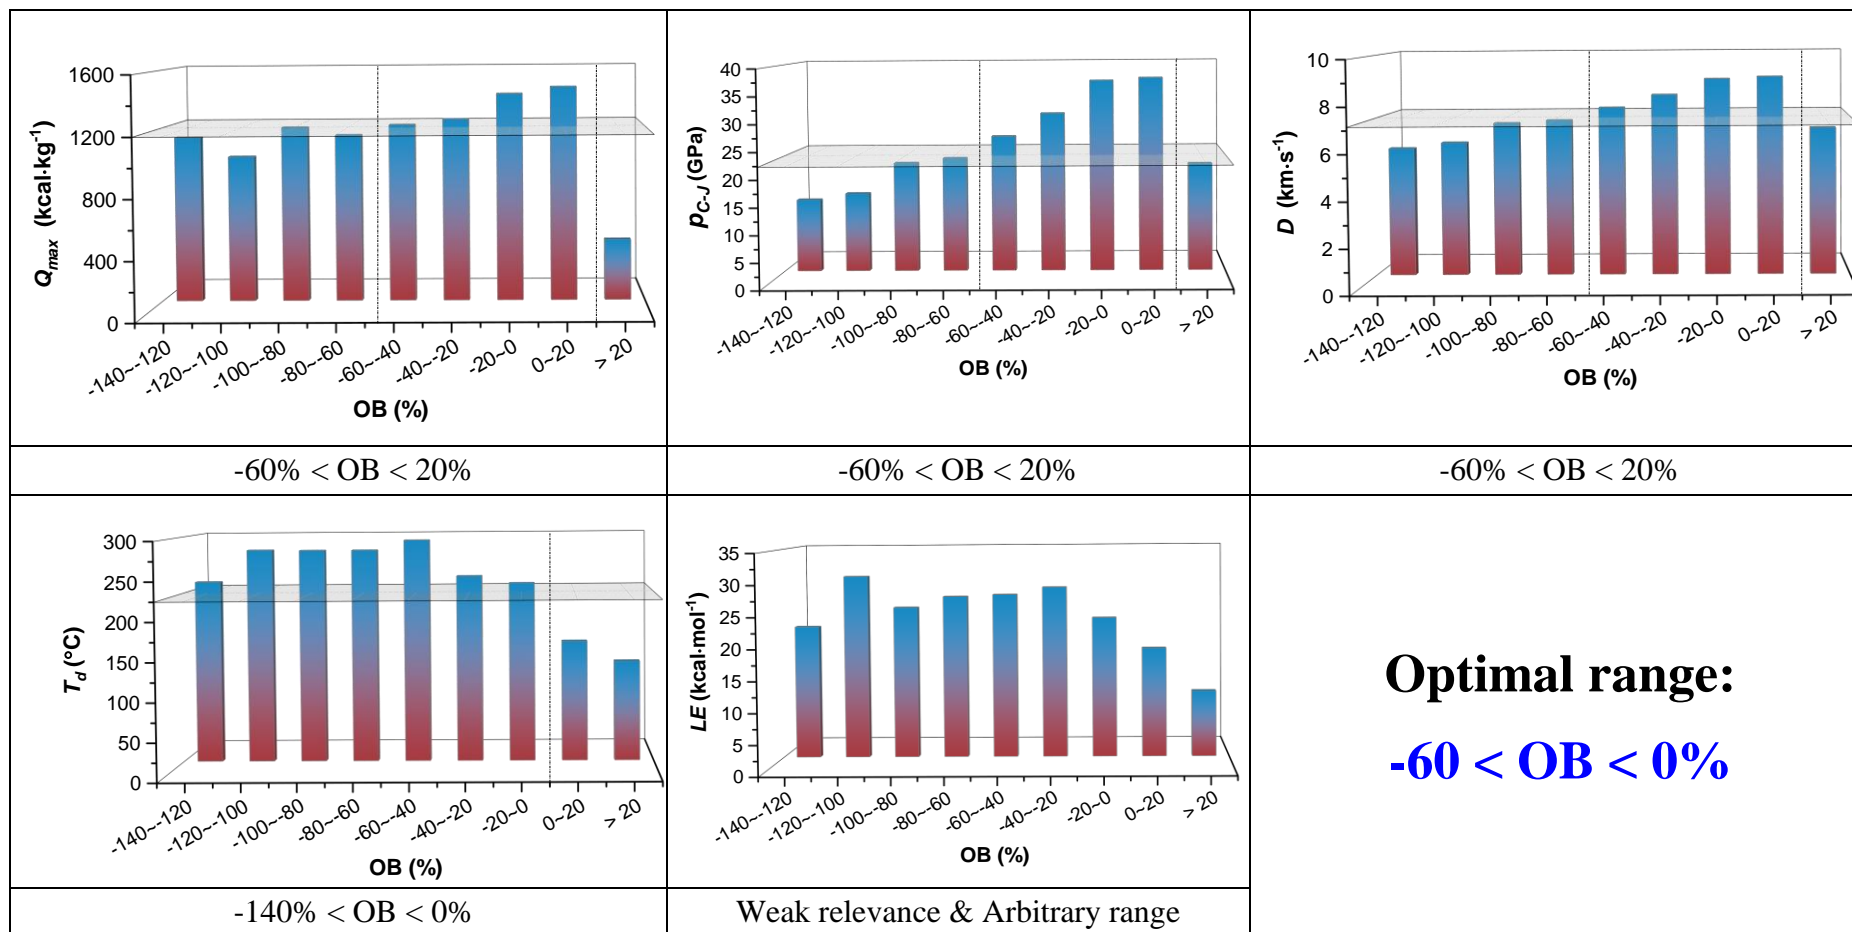

**Figure S22. Optimal range of oxygen balance in balancing detonation performance and stability of HEMDs. (Related to Table 2)**

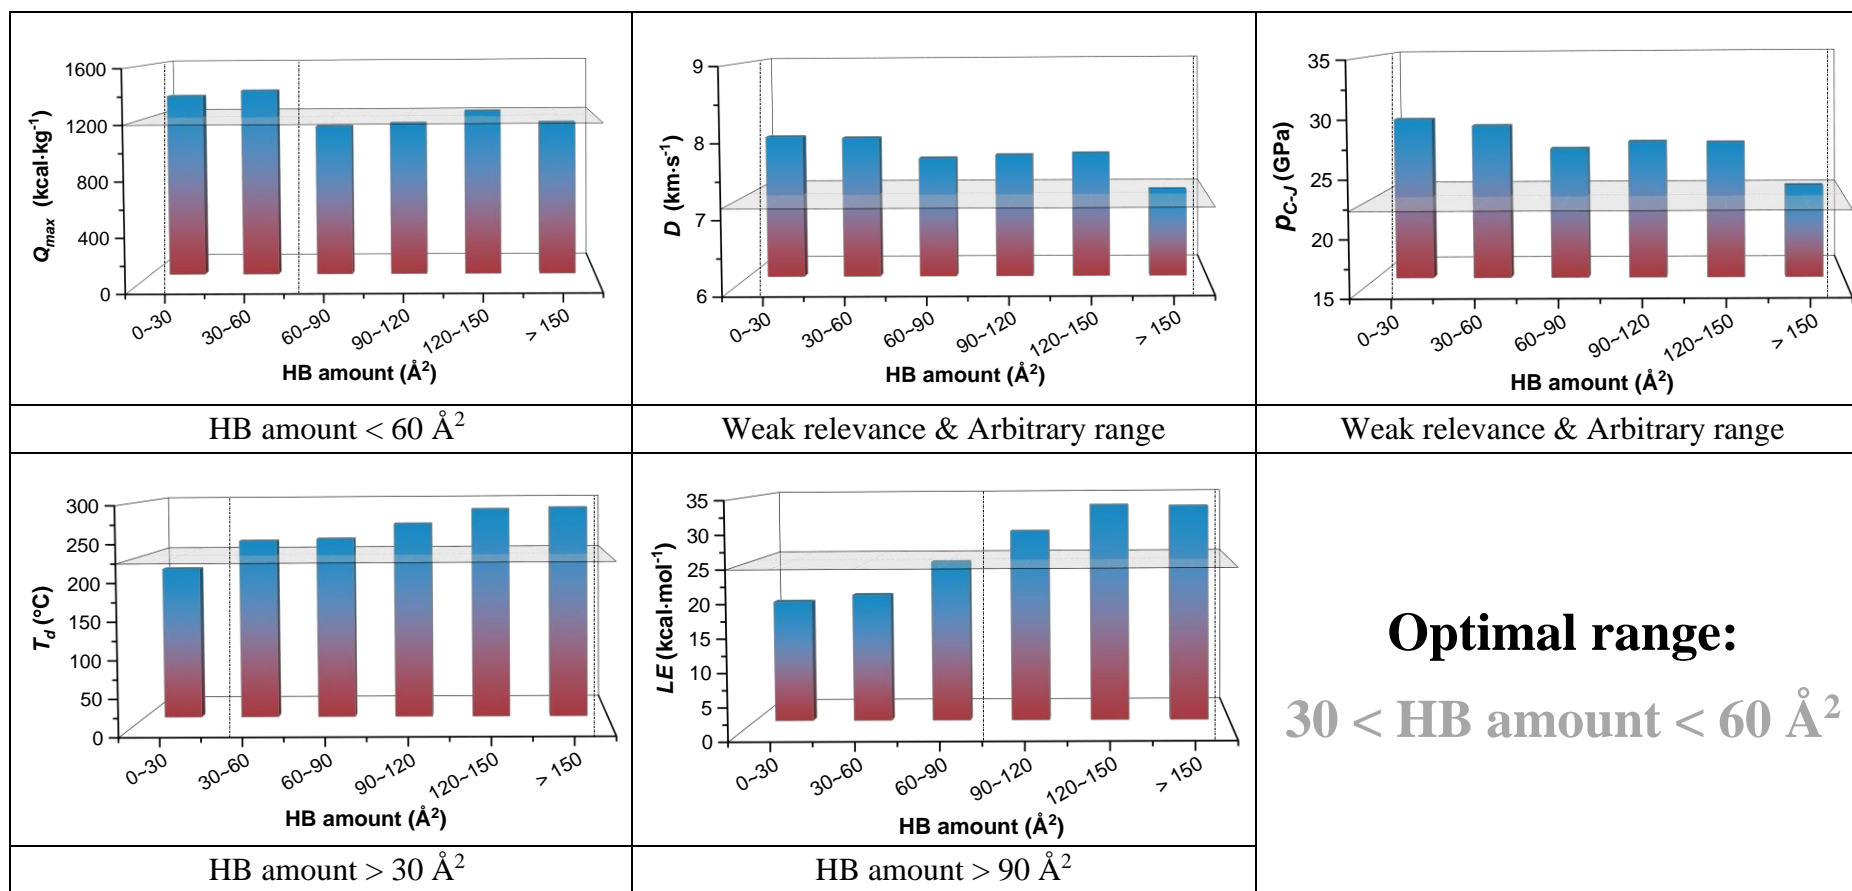

**Figure S23. Optimal range of HB amount in balancing detonation performance and stability of HEMDs. (Related to Table 2)**

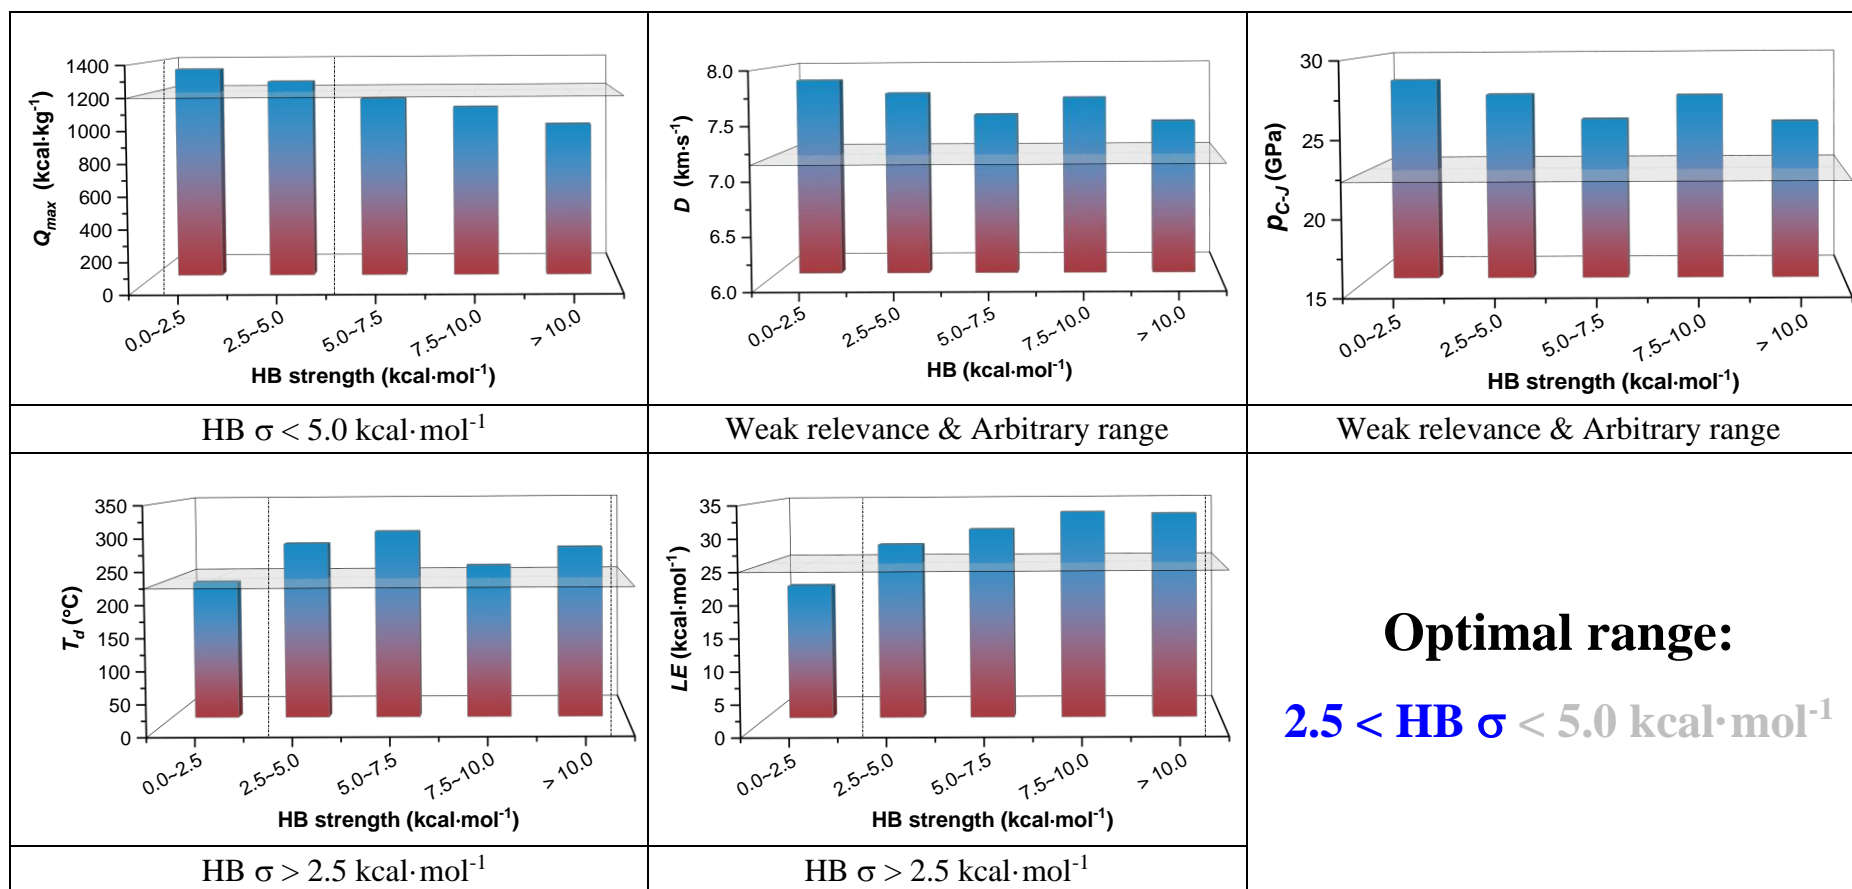

**Figure S24. Optimal range of HB strength in balancing detonation performance and stability of HEMDs. (Related to Table 2)**

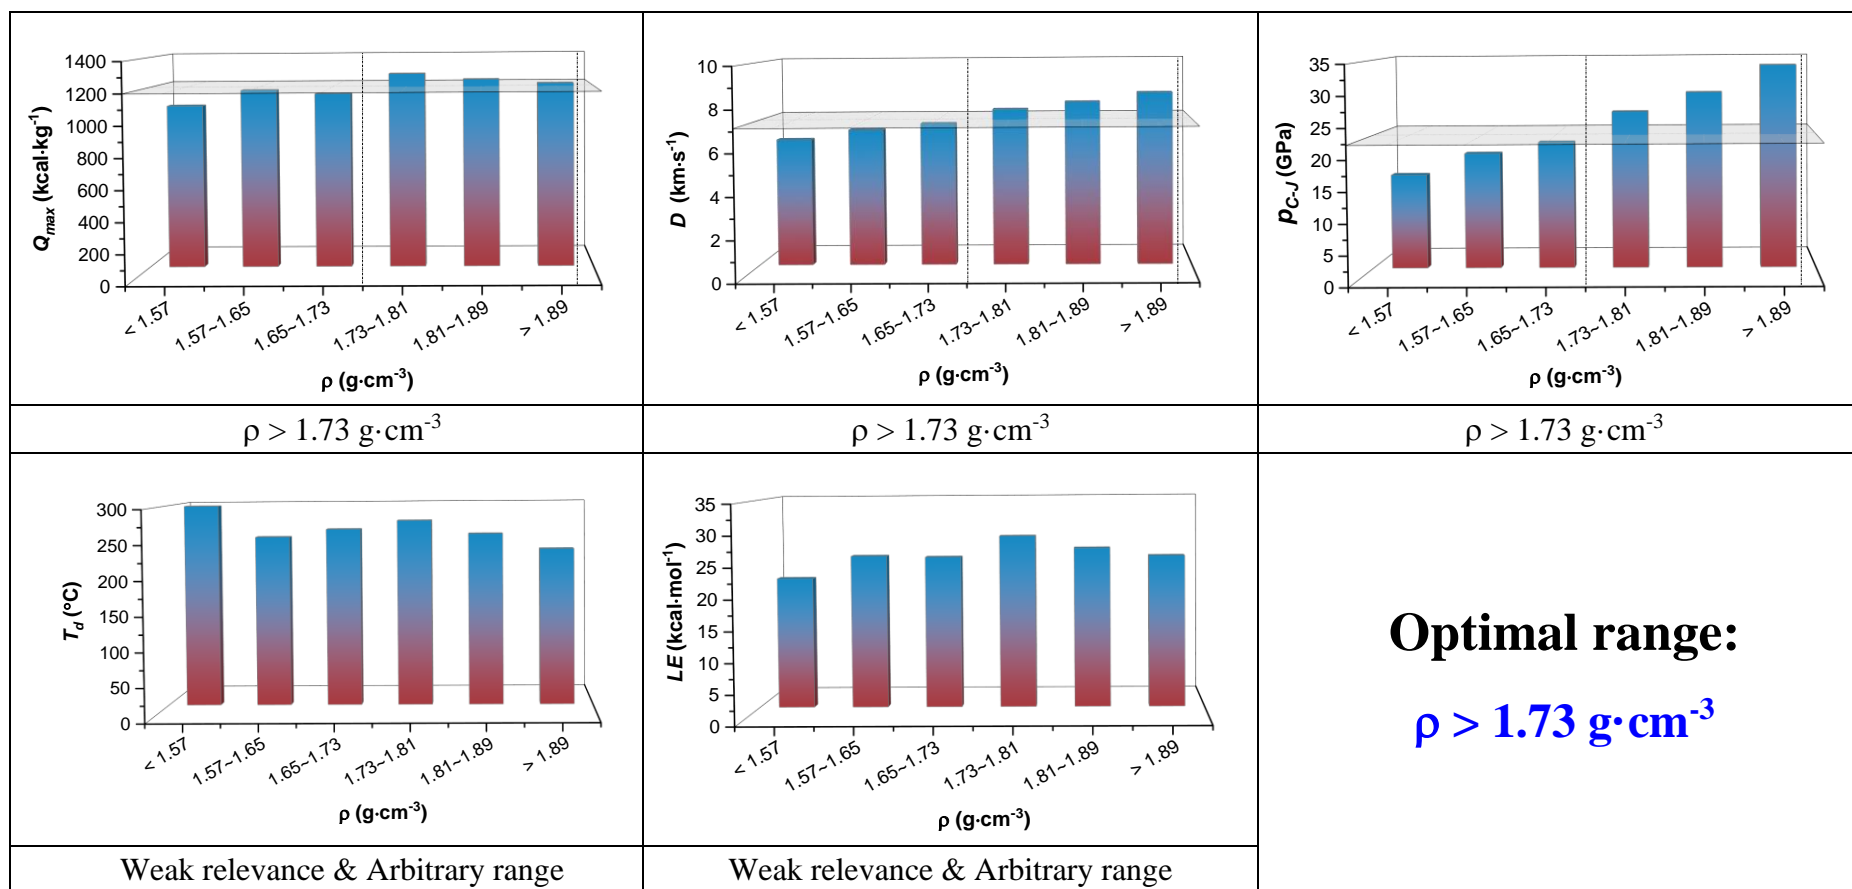

**Figure S25. Optimal range of material density in balancing detonation performance and stability of HEMDs.**  
 (Related to Table 2)

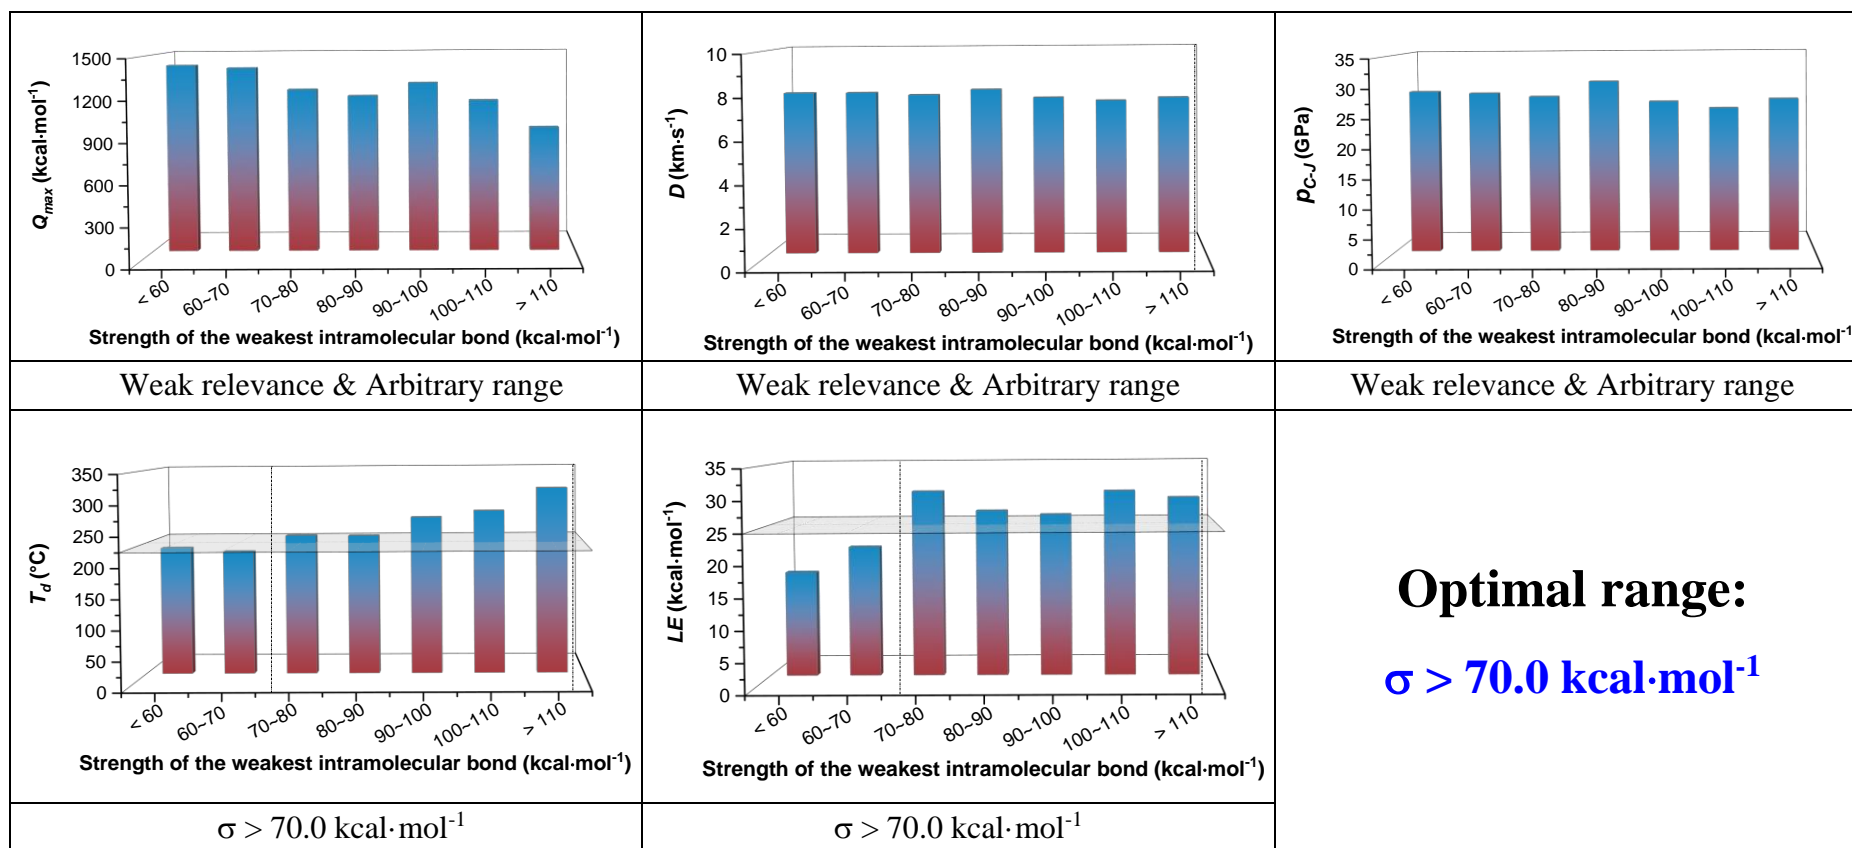

**Figure S26. Optimal range of strength of the weakest intramolecular bond in balancing detonation performance and stability of HEMDs. (Related to Table 2)**

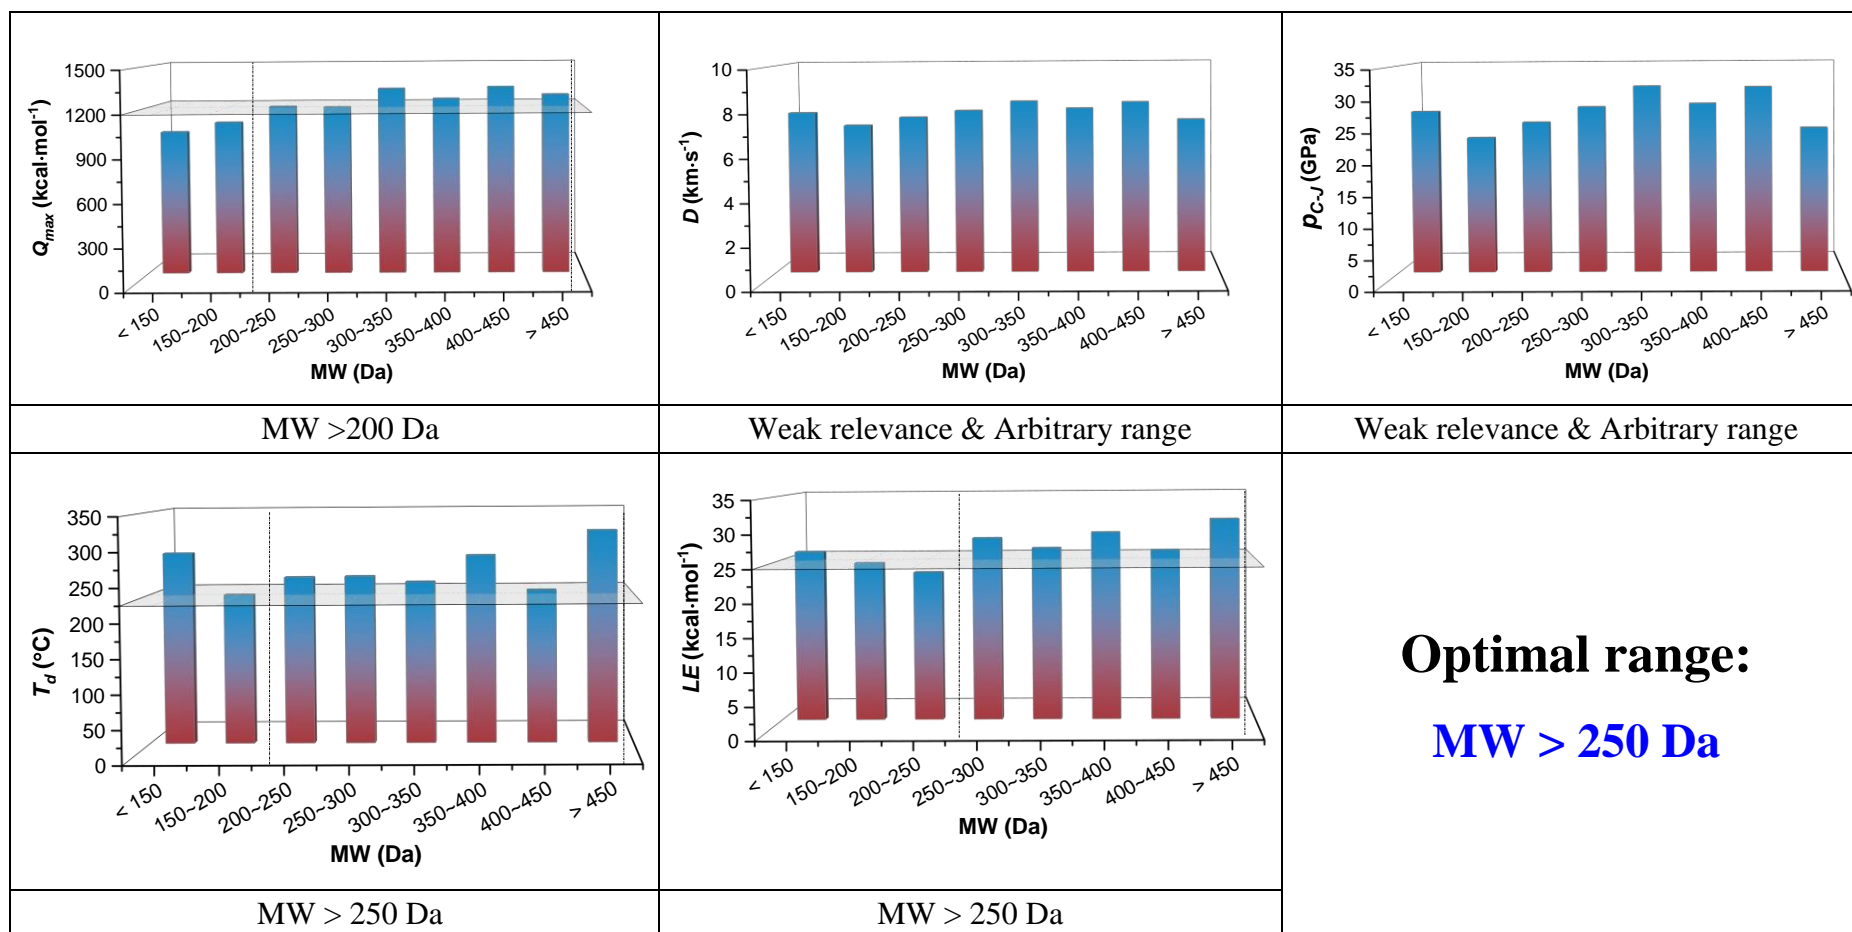

**Figure S27. Optimal range of molecular weight in balancing detonation performance and stability of HEMDs.**  
(Related to Table 2)

## References

- Akst, I. (1989). Heat of detonation, the cylinder test, and performance munitions. Los Alamos National Lab., NM (USA).
- Altenburg, T., Klapötke, T.M., and Penger, A. (2009). Primary nitramines related to nitroglycerine: 1-nitramino-2, 3-dinitroxypropane and 1, 2, 3-trinitraminopropane. *Cent. Eur. J. Energ. Mater.* *6*, 255-275.
- Altmann, K.L., Chafin, A.P., Merwin, L.H., Wilson, W.S., and Gilardi, R. (1998). Chemistry of tetraazapentalenes. *J. Org. Chem.* *63*, 3352-3356.
- Antonangeli, D., Farber, D.L., Said, A.H., Benedetti, L.R., Aracne, C.M., Landa, A., Söderlind, P., and Klepeis, J.E. (2010). Shear softening in tantalum at megabar pressures. *Phys. Rev. B* *82*, 132101.
- Atkins, R.L., Hollins, R.A., and Wilson, W.S. (1986). Synthesis of polynitro compounds. Hexasubstituted benzenes. *J. Org. Chem.* *51*, 3261-3266.
- Averkiev, B., Antipin, M.Y., Yudin, I., and Sheremetev, A. (2002). X-ray structural study of three derivatives of dinitropyrazine. *J. Mol. Struct.* *606*, 139-146.
- Averkiev, B.B., Antipin, M.Y., Sheremetev, A.B., and Timofeeva, T.V. (2003). Four 3-cyanodifurazanyl ethers: potential propellants. *Acta Crystallogr. Sect. C: Cryst. Struct. Commun.* *59*, o383-o387.
- Bachman, G.B., and Vogt, C.M. (1958). The  $\text{BF}_3 \cdot \text{N}_2\text{O}_4$  complex as a nitrating agent. *J. Am. Chem. Soc.* *80*, 2987-2991.
- Bagryanskaya, I.Y., and Gatilov, Y.V. (1983). Crystal structure of nitromethane. *J. Struct. Chem.* *24*, 150-151.
- Bemm, U., and Östmark, H. (1998). 1,1-diamino-2,2-dinitroethylene: A novel energetic material with infinite layers in two dimensions. *Acta Crystal.* *54*, 1997-1999.
- Blanksma, J.J. (1908). Bromination and Nitration of Meta-Substituted Phenols. *Rec. Trav. Chim.* *27*, 25-41.
- Boileau, J., Carail, M., Wimmer, E., Gallo, R., and Pierrot, M. (1985). Dérivés nitrés acétylés du glycoluril. *Propellants, Explos., Pyrotech.* *10*, 118-120.
- Bölter, M.F., Klapötke, T.M., Kustermann, T., Lenz, T., and Stierstorfer, J. (2018). Improving the Energetic Properties of Dinitropyrazoles by Utilization of Current Concepts. *Eur. J. Inorg. Chem.* *2018*, 4125-4132.
- Bolton, O., and Matzger, A.J. (2011). Improved stability and smart-material functionality realized in an energetic cocrystal. *Angew. Chem.* *123*, 9122-9125.
- Boyer, J., and Morgan, J., L (1959). Acid catalyzed reactions between carbonyl compounds and organic azides. II. aromatic aldehydes. *J. Org. Chem.* *24*, 561-562.
- Cai, H., Shu, Y., Huang, H., Cheng, B., and Li, J. (2004). Study on reactions of 2-(dinitromethylene)-4, 5-imidazolidinedione. *J. Org. Chem.* *69*, 4369-4374.
- Chavez, D.E., Parrish, D.A., and Leonard, P. (2012). The synthesis and characterization of a new furazan heterocyclic system. *Synlett* *23*, 2126-2128.
- Chaykovsky, M., and Adolph, H.G. (1990). Synthesis and properties of some trisubstituted trinitrobenzenes. TATB analogs. *J. Energ. Mater.* *8*, 392-414.
- Colonna, G.R., and Spencer, A.B. (2010). *Fire Protection Guide to Hazardous Materials* (14th edition) (National Fire Protection Association).
- Crawford, M.J., Evers, J., Göbel, M., Klapötke, T.M., Mayer, P., Oehlinger, G., and Welch, J.M. (2007).

- $\gamma$  - FOX - 7: Structure of a High Energy Density Material Immediately Prior to Decomposition. *Propellants, Explos., Pyrotech.* *32*, 478-495.
- Davis, T.L., and Abrams, A.J. (1925). The Dehydration of Ammonium Nitrate. *J. Am. Chem. Soc.* *47*, 1043-1045.
- Dobratz, B.M., and Crawford, P.C. (1985). LLNL explosives handbook - properties of chemical explosives and explosive simulants (Lawrence Livermore National Laboratory).
- Domasevitch, K.V., Gospodinov, I., Krautscheid, H., Klapötke, T.M., and Stierstorfer, J. (2019). Facile and selective polynitrations at the 4-pyrazolyl dual backbone: straightforward access to a series of high-density energetic materials. *New J. Chem.* *43*, 1305-1312.
- Dong, H., and Zhou, F. (1989). *High-Energy Explosives and Related Properties* (Science Press).
- Du, Y., Wang, Y.H., Li, Y.J., Zheng, Z.H., and Wang, J.L. (2013). Theoretical Calculation of the Detonation Parameters of ANPyO and Comparison between ANPyO and me (ANPyO) x on their Performance. *Adv. Mater. Res.* *791*, 60-63.
- Fischer, D., Gottfried, J.L., Klapötke, T.M., Karaghiosoff, K., Stierstorfer, J., and Witkowski, T.G. (2016). Synthesis and investigation of advanced energetic materials based on bispyrazolylmethanes. *Angew. Chem.* *128*, 16366-16369.
- Fischer, D., Klapötke, T.M., and Stierstorfer, J. (2014). Synthesis and characterization of diaminobisfuroxane. *Eur. J. Inorg. Chem.* *2014*, 5808-5811.
- Fischer, N., Fischer, D., Klapötke, T.M., Piercey, D.G., and Stierstorfer, J. (2012). Pushing the limits of energetic materials—the synthesis and characterization of dihydroxylammonium 5, 5'-bistetrazole-1, 1'-diolate. *J. Mater. Chem.* *22*, 20418-20422.
- Fonger, G.C., Hakkinen, P., Jordan, S., and Publicker, S. (2014). The National Library of Medicine's (NLM) Hazardous Substances Data Bank (HSDB): background, recent enhancements and future plans. *Toxicology* *325*, 209-216.
- Fried, L.E. (1998). LLNL CHEETAH Reactant Library. 1.0 ed.: SANDIA REPORT SAND98-1191, Unlimited Release.
- Gao, B., Wang, D., Zhang, J., Hu, Y., Shen, J., Wang, J., Huang, B., Qiao, Z., Huang, H., Nie, F., et al. (2014). Facile, continuous and large-scale synthesis of CL-20/HMX nano co-crystals with high-performance by ultrasonic spray-assisted electrostatic adsorption method. *J. Mater. Chem. A* *2*, 19969-19974.
- Gill, R., Asaoka, L., and Baroody, E. (2006). On underwater detonations, 1. A new method for predicting the CJ detonation pressure of explosives. *J. Energ. Mater.* *5*, 287-307.
- Goebel, M., Klapoetke, T.M., and Mayer, P. (2006). Crystal structures of the potassium and silver salts of nitroform. *Z. Anorg. Allg. Chem.* *632*, 1043-1050.
- Gore, G., Sivabalan, R., Nair, U., Saikia, A., Venugopalan, S., and Gandhe, B. (2007). Synthesis of CL-20: By oxidative debenzoylation with cerium (IV) ammonium nitrate (CAN). *Indian J. Chem.* *46B*, 505-508.
- Guillou, S., Jacob, G., Terrier, F., and Goumont, R. (2009). An unexpected synthesis of 7-azidofurazano[3,4-b]tetrazolopyrazine. *Tetrahedron* *65*, 8891-8895.
- Guo, J., Zhang, T., Zhang, J., and Liu, Y. (2006). Experimental Studies on the 2,4,6-Trinitro-m-Xylene Crystal. *Chin. J. Explos. Propellants* *29*, 58-62.



Hall, R.H., and Wright, G.F. (1951). Reaction of acetyl chloride with 1-nitro-2-nitramino-2-propoxyimidazolidine. *J. Am. Chem. Soc.* *73*, 2213-2216.

He, Z., Yan, S., and Liu, Z. (2013). Thermal Decomposition Characteristics of 2,6-Diamino-3,5-dinitropyridine-1-oxide. *Chin. J. Explos. Propellants* *36*, 51.

Headquarters, D.T.A. (1984). *Military Explosives* (Headquarters department the army).

Hobbs, M.L., and Baer, M.R. (1993) Published. Calibrating the BKW-EOS with a large product species data base and measured C-J properties. 10th Symposium (International) on Detonation, 1993 of Conference Boston, Massachusetts. 409.

Hong, D., Li, Y., Zhu, S., Zhang, L., and Pang, C. (2015). Three insensitive energetic co-crystals of 1-nitronaphthalene, with 2, 4, 6-trinitrotoluene (TNT), 2, 4, 6-trinitrophenol (picric acid) and D-mannitol hexanitrate (MHN). *Cent. Eur. J. Energ. Mater.* *12*, 47-62.

Huang, H., Shi, Y., Yang, J., and Li, B. (2015). Compatibility study of dihydroxylammonium 5, 5'-bistetrazole-1, 1'-diolate (TKX-50) with some energetic materials and inert materials. *J. Energ. Mater.* *33*, 66-72.

Huang, H., Zhou, Z., Song, J., Liang, L., Wang, K., Cao, D., Sun, W., Dong, X., and Xue, M. (2011). Energetic salts based on dipicrylamine and its amino derivative. *Chemistry—A European Journal* *17*, 13593-13602.

Huang, J., Cheng, B., Ma, Q., and Nie, F. (2011). The study of synthesis technology and performance of HNBB. *Chin. J. Energ. Mater.* *19*, 240.

Huang, Q., Ma, Y., Guo, Z., Liao, L., Hao, S., Nie, F., and Li, H. (2019). An unexpected method to synthesize fluorinated derivative of ANPZ. *Propellants, Explos., Pyrotech.* *44*, 1521-1527.

Hussein, A.K., Zeman, S., and Elbeih, A. (2018). Synthesis, Performance, and Thermal Behavior of a Novel Insensitive EDNA/DAT Co-crystal. *Zeitschrift für anorganische und allgemeine Chemie* *644*, 430-437.

Jiao, Q., Zhu, Y., Xing, J., Ren, H., and Huang, H. (2014). Thermal Decomposition of Rdx/Ap by Tg–Dsc–Ms–Ftir. *J. Therm. Anal. Calorim.* *116*, 1125-1131.

Kamlet, M.J., and Dickinson, C. (1968). Chemistry of detonations. III. Evaluation of the simplified calculational method for chapman-jouguet detonation pressures on the basis of available experimental information. *J. Chem. Phys.* *48*, 43-50.

Keshavarz, M.H. (2005). Simple procedure for determining heats of detonation. *Thermochim. Acta* *428*, 95-99.

Keshavarz, M.H. (2007). Detonation velocity of pure and mixed CHNO explosives at maximum nominal density. *J. Hazard. Mater.* *141*, 536-539.

Keshavarz, M.H. (2007). Quick estimation of heats of detonation of aromatic energetic compounds from structural parameters. *J. Hazard. Mater.* *143*, 549-554.

Keshavarz, M.H. (2008). Estimating heats of detonation and detonation velocities of aromatic energetic compounds. *Propellants, Explos., Pyrotech.* *33*, 448-453.

Keshavarz, M.H. (2012). A simple way to predict heats of detonation of energetic compounds only from their molecular structures. *Propellants, Explos., Pyrotech.* *37*, 93-99.

Keshavarz, M.H., and Pouretedal, H.R. (2005). Predicting the detonation velocity of CHNO explosives by a simple method. *Propellants, Explos., Pyrotech.* *30*, 105-108.

- Kettner, M.A., Karaghiosoff, K., Klapötke, T.M., Sućeska, M., and Wunder, S. (2014). 3, 3'-Bi (1, 2, 4-oxadiazoles) Featuring the Fluorodinitromethyl and Trinitromethyl Groups. *Chemistry—A European Journal* 20, 7622-7631.
- Khire, V., Talawar, M., Prabhakaran, K., Mukundan, T., and Kurian, E. (2005). Spectro-thermal decomposition study of 1, 4-dinitroglycoluril (DINGU). *J. Hazard. Mater.* 119, 63-68.
- Kim, S., Chen, J., Cheng, T., Gindulyte, A., He, J., He, S., Li, Q., Shoemaker, B.A., Thiessen, P.A., Yu, B., et al. (2018). PubChem 2019 update: improved access to chemical data. *Nucleic Acids Res.* 47, D1102-D1109.
- Klapötke, T.M., Mieskes, F., Stierstorfer, J., and Weyrauther, M. (2016). Studies on Energetic Salts Based on (2, 4, 6-Trinitrophenyl) guanidine. *Propellants, Explos., Pyrotech.* 41, 217-222.
- Klapötke, T.M., Stierstorfer, J., Weyrauther, M., and Witkowski, T.G. (2016). Synthesis and Investigation of 2, 6-Bis (picrylamino)-3, 5-dinitro-pyridine (PYX) and Its Salts. *Chemistry—A European Journal* 22, 8619-8626.
- Klapötke, T.M., and Witkowski, T.G. (2016). 5, 5'-Bis (2, 4, 6-trinitrophenyl)-2, 2'-bi (1, 3, 4-oxadiazole)(TKX-55): Thermally Stable Explosive with Outstanding Properties. *ChemPlusChem* 81, 357-360.
- Kofler, A., and Brandstätter, M. (1948). Zur isomorphen vertretbarkeit von H, OH, Cl: S-trinitrobenzol, pikrinsäure, pikrylchlorid. *Monatshefte für Chemie und verwandte Teile anderer Wissenschaften* 78, 65-70.
- Kumar, D., Tang, Y., He, C., Imler, G.H., Parrish, D.A., and Shreeve, J.N.M. (2018). Multipurpose Energetic Materials by Shuffling Nitro Groups on a 3, 3'-Bipyrazole Moiety. *Chemistry—A European Journal* 24, 17220-17224.
- Kwasny, M., and Syczewski, M. (1980). Preparation and some physicochemical properties of compounds with trinitromethyl group. *Biul. Wojsk. Akad. Tech. Im. Jaroslawa Dabrowskiego* 29, 165-172.
- Lange, K., Koenig, A., Roegler, C., Seeling, A., and Lehmann, J. (2009). NO donors. Part 18: Bioactive metabolites of GTN and PETN—Synthesis and vasorelaxant properties. *Bioorg. Med. Chem. Lett.* 19, 3141-3144.
- Lee, J., Hsu, C., and Chang, C. (2002). A study on the thermal decomposition behaviors of PETN, RDX, HNS and HMX. *Thermochim. Acta* 392, 173-176.
- Lee, P.P., and Back, M.H. (1986). Kinetic studies of the thermal decomposition of tetryl using accelerating rate calorimetry: part I. Derivation of the activation energy for decomposition. *Thermochim. Acta* 107, 1-16.
- Leemann, H., and Grandmougin, E. (1908). Zur Kenntnis des symm. Hexanitro-azobenzols. *Ber. Dtsch. Chem. Ges.* 41, 1295-1305.
- Leonard, N.J., Miller, L.A., and Thomas, P.D. (1956). Unsaturated amines. VIII. Dehydrogenation and hydroxylation of 1-methyldecahydroquinoline by means of mercuric acetate. *J. Am. Chem. Soc.* 78, 3463-3468.
- Leonard, P.W., Pollard, C.J., Chavez, D.E., Rice, B.M., and Parrish, D.A. (2011). 3, 6-Bis (4-nitro-1, 2, 5-oxadiazol-3-yl)-1, 4, 2, 5-dioxadiazene (BNDD): A Powerful Sensitive Explosive. *Synlett* 22, 2097-2099.
- Lewis, R.J., and Sax, N. (1996). *Sax's dangerous properties of industrial materials* (New York).

- Li, B., Dong, H., and Zhang, J. (2003). Thermal Properties of Main By-products in TATB. *Chin. J. Energ. Mater.* *11*, 85-87.
- Li, C., Liang, L., Wang, K., Bian, C., Zhang, J., and Zhou, Z. (2014). Polynitro-substituted bispyrazoles: a new family of high-performance energetic materials. *J. Mater. Chem. A* *2*, 18097-18105.
- Li, H., An, C., Wen, X., Wang, J., and Du, M. (2016). Study on kinetic parameters of thermal decomposition reaction and thermal stability of 3, 4-bis (3-nitrofurazan-4-yl) furoxan based on Kissinger method. *Chin. J. Explos. Propellants* *39*, 58-65.
- Li, H., Li, D., Zeng, X., Liu, K., Beckers, H., Schaefer III, H.F., Esselman, B.J., and McMahon, R.J. (2015). Toward Understanding the Decomposition of Carbonyl Diazide (N<sub>3</sub>)<sub>2</sub>CO and Formation of Diazirone cycl-N<sub>2</sub>CO: Experiment and Computations. *J. Phys. Chem. A* *119*, 8903-8911.
- Li, H., Zhang, L., Petrutik, N., Wang, K., Ma, Q., Shem-Tov, D., Zhao, F., and Gozin, M. (2019). Molecular and crystal features of thermostable energetic materials: guidelines for architecture of “bridged” compounds. *ACS Cent. Sci.* *6*, 54-75.
- Li, W., Li, Z., and Wang, W. (2009). Preparation and Properties of TOATF. *Chin. J. Energ. Mater.* *17*, 11-13.
- Licht, H., and Ritter, H. (1988). 2, 4, 6 - Trinitropyridine and Related Compounds, synthesis and characterization. *Propellants, Explos., Pyrotech.* *13*, 25-29.
- Liu, L., Jin, X., Wang, P., Zhou, X., and Lu, M. (2016). Synthesis Improvement and Thermal Properties of Bis(2,2,2-Trinitroethyl)-Nitramine (BTNNA). *Explos. Mater.* *45*, 47-50.
- Liu, L., Zhang, Y., Zhang, S., and Fei, T. (2015). Heterocyclic Energetic Salts of 4, 4', 5, 5'-Tetranitro-2, 2'-Biimidazole. *J. Energ. Mater.* *33*, 202-214.
- Liu, N., Shu, Y., Li, H., Zhai, L., Li, Y., and Wang, B. (2015). Synthesis, characterization and properties of heat-resistant explosive materials: polynitroaromatic substituted difurazano [3, 4-b: 3', 4'-c] pyrazines. *RSC Adv.* *5*, 43780-43785.
- Liu, N., Wang, B., Liu, H., Li, Y., Huo, H., Zhai, L., and Lai, W. (2015). Synthesis Crystal Structure and Thermal Properties of Two Furazano [3,4-b] tetrazolo [1,2-d] pyrazines. *Chin. J. Energ. Mater.* *23*, 13-17.
- Makhova, N.N., Epishina, M.A., Ovchinnikov, I.V., and Pivina, T.S. (2003). New macrocyclic systems containing difurazanyl and furazanofuroxanyl units. *Int. Annu. Conf. ICT 34th*, 80.
- Manelis, G., Nazin, G., and Prokudin, V. (2006) Published. The additional activation volume of unimolecular reactions in the solid phase. *Doklady Physical Chemistry, 2006 of Conference.*: Springer, 335-338.
- Meneil, S.K., Kelley, S.P., Beg, C., Cook, H., Rogers, R.D., and Nikles, D.E. (2013). Cocrystals of 10-methylphenthiazine and 1, 3-dinitrobenzene: implications for the optical sensing of TNT-based explosives. *ACS Appl. Mater. Interfaces* *5*, 7647-7653.
- Meyer, R., Köhler, J., and Homburg, A. (2016). *Explosives* (John Wiley & Sons).
- Meyer, R., Köhler, J., and Homburg, D.I.A. (2007). *Explosives* (Wiley-VCH Verlag GmbH & Co. KGaA).
- Mo, Z., Zhang, A., Cao, X., Liu, Q., Xu, X., An, H., Pei, W., and Zhu, S. (2010). JASMIN: a parallel software infrastructure for scientific computing. *Front. Comput. Sci. China* *4*, 480-488.
- Nair, U., Gore, G., Sivabalan, R., Pawar, S., Asthana, S., and Venugopalan, S. (2007). Preparation and

thermal studies on tetranitrodibenzo tetraazapentalene (TACOT): A thermally stable high explosive. *J. Hazard. Mater.* *143*, 500-505.

Nielsen, A.T., Atkins, R.L., and Norris, W.P. (1979). Oxidation of poly (nitro) anilines to poly (nitro) benzenes. Synthesis of hexanitrobenzene and pentanitrobenzene. *J. Org. Chem.* *44*, 1181-1182.

Ohta, A., Ogihara, Y., Nei, K., and Shibata, S. (1963). On Methylphenylnaphthalenes. I. Syntheses of Methylphenylnaphthalenes. *Chem. Pharm. Bull.* *11*, 754-758.

Pepekin, V., Matyushin, Y.N., and Gubina, T. (2011). Enthalpy of formation and explosive properties of 5, 6-(3, 4-furazano)-1, 2, 3, 4-tetrazine-1, 3-dioxide. *Russ. J. Phys. Chem. B* *5*, 97.

Politzer, P., and Murray, J.S. (2011). Some perspectives on estimating detonation properties of C, H, N, O compounds. *Cent. Eur. J. Energ. Mater.* *8*, 209-220.

Qu, Y., and Babailov, S.P. (2018). Azo-linked high-nitrogen energetic materials. *J. Mater. Chem. A* *6*, 1915-1940.

Rice, B.M., and Hare, J. (2002). Predicting heats of detonation using quantum mechanical calculations. *Thermochim. Acta* *384*, 377-391.

Rieckmann, T., Völker, S., Lichtblau, L., and Schirra, R. (2001). Investigation on the thermal stability of hexanitrostilbene by thermal analysis and multivariate regression. *Chem. Eng. Sci.* *56*, 1327-1335.

Roháč, M., Zeman, S., and Růžička, A. (2008). Crystallography of 2, 2', 4, 4', 6, 6'-Hexanitro-1, 1'-biphenyl and Its Relation to Initiation Reactivity. *Chem. Mater.* *20*, 3105-3109.

Rothstein, L.R., and Petersen, R. (1979). Predicting high explosive detonation velocities from their composition and structure. *Propellants, Explos., Pyrotech.* *4*, 56-60.

Saraf, S., Rogers, W., and Mannan, M.S. (2003). Prediction of reactive hazards based on molecular structure. *J. Hazard. Mater.* *98*, 15-29.

Šarlauskas, J. (2010). Polynitrobenzenes containing alkoxy and alkylendioxy groups: potential HEMs and precursors of new energetic materials. *Cent. Eur. J. Energ. Mater.* *7*, 313-324.

Schmidt, J., and Gehlen, H. (1965). PK-werte von derivaten des 1, 2, 4-triazols. *Zeitschrift für Chemie* *5*, 304-304.

Sheremetev, A.B., Kulagina, V.O., Aleksandrova, N.S., Dmitriev, D.E., Strelenko, Y.A., Lebedev, V.P., and Matyushin, Y.N. (1998). Dinitro trifurazans with oxy, azo, and azoxy bridges. *Propellants, Explos., Pyrotech.* *23*, 142-149.

Sheremetev, A.B., Kulagina, V.O., and Ivanova, E.A. (1996). Zero-hydrogen furazan macrocycles with oxy and azo bridges. *J. Org. Chem.* *61*, 1510-1511.

Sheremetev, A.B., Lyalin, B.V., Kozeev, A.M., Palysaeva, N.V., Struchkova, M.I., and Suponitsky, K.Y. (2015). A practical anodic oxidation of aminofurazans to azofurazans: an environmentally friendly route. *RSC Adv.* *5*, 37617-37625.

Siele, V., and Warman, M. (1962). Preparation of 1, 3-Difluoro-2, 4, 6-trinitrobenzene. *J. Org. Chem.* *27*, 1910-1911.

Sikder, N., Sikder, A., Bulakh, N., and Gandhe, B. (2004). 1, 3, 3-Trinitroazetidide (TNAZ), a melt-cast explosive: synthesis, characterization and thermal behaviour. *J. Hazard. Mater.* *113*, 35-43.

Sinditskii, V., Burzhava, A., Chernyi, A., Shmelev, D., Apalkova, V., Palysaeva, N., and Sheremetev, A. (2016). A comparative study of two difurazanyl ethers. *J. Therm. Anal. Calorim.* *123*, 1431-1438.

Singh, A., Sikder, N., and Sikder, A.K. (2005). Improved synthesis of an energetic material, 1, 3, 3-

trinitroazetidine (TNAZ) exploiting 2-iodoxy benzoic acid (IBX) as an oxidising agent. *Indian J. Chem.* *44B*, 2560-2563.

Spencer, E., and Wright, G.F. (1946). Preparation of picramide. *Can. J. Res.* *24*, 204-207.

Srinivasan, P., Gunasekaran, M., Kanagasekaran, T., Gopalakrishnan, R., and Ramasamy, P. (2006). 2, 4, 6-trinitrophenol (TNP): An organic material for nonlinear optical (NLO) applications. *J. Cryst. Growth* *289*, 639-646.

Tang, Y., He, C., Imler, G.H., Parrish, D.A., and Jean'ne, M.S. (2018). Ring closure of polynitroazoles via an N, N'-alkylene bridge: towards high thermally stable energetic compounds. *J. Mater. Chem. A* *6*, 8382-8387.

Tang, Y., He, C., Imler, G.H., Parrish, D.A., and Jean'ne, M.S. (2018). AC-C bonded 5, 6-fused bicyclic energetic molecule: exploring an advanced energetic compound with improved performance. *Chem. Commun.* *54*, 10566-10569.

Tang, Y., Kumar, D., and Shreeve, J.N.M. (2017). Balancing excellent performance and high thermal stability in a dinitropyrazole fused 1, 2, 3, 4-tetrazine. *J. Am. Chem. Soc.* *139*, 13684-13687.

Taylor, H.A., and Vesselovsky, V.V. (2002). The thermal decomposition of nitromethane. *J. Phys. Chem.* *39*, 1095-1102.

Terrier, F., Xie, H.Q., and Farrell, P.G. (1990). The effect of nitro-substitution upon diphenylmethane reactivity. *J. Org. Chem.* *55*, 2610-2616.

Tian, D., Zhao, F., and Liu, J. (2011). *Handbook of energetic materials and the related compounds* (National Defense Industry Press).

Trotter, J. (1960). The crystal structure of 1, 5-dinitronaphthalene. *Acta Crystallogr.* *13*, 95-99.

Tsyshevsky, R., Pagoria, P., Smirnov, A.S., and Kuklja, M.M. (2017). Comprehensive end-to-end design of novel high energy density materials: II. Computational modeling and predictions. *J. Phys. Chem. C* *121*, 23865-23874.

Türker, L. (2012). A trigonometric approach to a limiting law on detonation velocity. *Match-Communications in Mathematical and Computer Chemistry* *67*, 127.

Ulpiani, C. (1912). Constitution of Fulminuric Acids. IV. Compounds of the Formula H<sub>2</sub>(C<sub>2</sub>N<sub>2</sub>O<sub>3</sub>). *Gazz. Chim. Ital.* *42*, 243-63.

Veauthier, J.M., Chavez, D.E., Tappan, B.C., and Parrish, D.A. (2010). Synthesis and characterization of furazan energetics ADAAF and DOATF. *J. Energ. Mater.* *28*, 229-249.

Volk, F., and Bathelt, H. (1997). Influence of energetic materials on the energy-output of gun propellants. *Propellants, Explos., Pyrotech.* *22*, 120-124.

Wang, G., Xiao, H., Ju, X., and Gong, X. (2006). Calculation of detonation velocity, pressure, and electric sensitivity of nitro arenes based on quantum chemistry. *Propellants, Explos., Pyrotech.* *31*, 361-368.

Wang, G., Xiao, H., Xu, X., and Ju, X. (2006). Detonation velocities and pressures, and their relationships with electric spark sensitivities for nitramines. *Propellants, Explos., Pyrotech.* *31*, 102-109.

Wang, H., Wang, Y., Li, Y., Liu, Y., and Tan, Y. (2014). Scale-up synthesis and characterization of 2, 6-diamino-3, 5-dinitropyrazine-1-oxide. *Def. Technol.* *10*, 343-348.

Wang, Y., Yang, Z., Li, H., Zhou, X., Zhang, Q., Wang, J., and Liu, Y. (2014). A novel cocrystal explosive of HNIW with good comprehensive properties. *Propellants, Explos., Pyrotech.* *39*, 590-596.

Wei, J., Li, F., Xu, J., and Peng, X. (2015). Synthesis and thermal stability of new polynitrostilbenes.

Aust. J. Chem. 68, 919-925.

Wikipedia. 2006. Kamlet-Jacobs-Gleichungen [Online]. Available: <https://de.wikipedia.org/wiki/Kamlet-Jacobs-Gleichungen>.

Wu, J., Zhang, J., Li, T., Li, Z., and Zhang, T. (2015). A novel cocrystal explosive NTO/TZTN with good comprehensive properties. RSC Adv. 5, 28354-28359.

Wurzenberger, M.H., Lechner, J.T., Lommel, M., Klapötke, T.M., and Stierstorfer, J. (2020). Salts of Picramic Acid—Nearly Forgotten Temperature - Resistant Energetic Materials. Propellants, Explos., Pyrotech.

Yan, T., Cheng, G., and Yang, H. (2019). 1, 2, 4-Oxadiazole-Bridged Polynitropyrazole Energetic Materials with Enhanced Thermal Stability and Low Sensitivity. ChemPlusChem 84, 1567-1577.

Yang, C.H., Lu, Y.M., Yan, M.Q., Li, J., Wu, J., Li, Q.Y., Yang, J., Shen, L., Yang, G.W., and Zou, J.H. (2016). Nitrogen-rich 1, 2-bis (tetrazol-5-yl) ethane and its Carboxylate Derivative for Potential Energetic Materials. ChemistrySelect 1, 2757-2761.

Yang, Z., Li, H., Zhou, X., Zhang, C., Huang, H., Li, J., and Nie, F. (2012). Characterization and properties of a novel energetic-energetic cocrystal explosive composed of HNIW and BTF. Cryst. Growth Des. 12, 5155-5158.

Yang, Z., Zeng, Q., Zhou, X., Zhang, Q., Nie, F., Huang, H., and Li, H. (2014). Cocrystal explosive hydrate of a powerful explosive, HNIW, with enhanced safety. RSC Adv. 4, 65121-65126.

Yin, P., and Shreeve, J.N.M. (2015). From N-Nitro to N-Nitroamino: Preparation of High-Performance Energetic Materials by Introducing Nitrogen-Containing Ions. Angew. Chem. 127, 14721-14725.

Yin, P., Zhang, J., Imler, G.H., Parrish, D.A., and Shreeve, J.N.M. (2017). Polynitro-Functionalized Dipyrazolo-1, 3, 5-triazinanes: Energetic Polycyclization toward High Density and Excellent Molecular Stability. Angew. Chem. 129, 8960-8964.

Yin, P., Zhang, J., Parrish, D.A., and Jean'ne, M.S. (2014). Energetic N, N'-Ethylene-Bridged Bis (nitropyrazoles): Diversified Functionalities and Properties. Chemistry—A European Journal 20, 16529-16536.

Zaitsev, A., Kortusov, I., Dalinger, I., Kachala, V., Popova, G., and Shevelev, S. (2009). Nitropyrazoles 16. The use of methoxymethyl group as a protecting group for the synthesis of 4-methyl-3-nitro-5-R-pyrazoles. Russ. Chem. Bull. 58, 2118-2121.

Zeman, S. (1980). Possibilities of applying Piloyan method of determination of decomposition activation energies in differential thermal analysis of polynitroaromatic compounds and their derivatives: Part IV. 1, 3, 5-trinitrobenzene, 2, 2', 4, 4', 6, 6'-hexanitrobiphenyl, 2, 2', 2'', 4, 4', 4'', 6, 6', 6''-nonanitro-m-terphenyl, 1, 4, 5, 8-tetranitronaphthalene and 2, 4, 6-tripicryl-1, 3, 5-triazine. J. Therm. Anal. Calorim. 19, 207-214.

Zeman, S. (1993). The thermoanalytical study of some aminoderivatives of 1, 3, 5-trinitrobenzene. Thermochim. Acta 216, 157-168.

Zeman, S. (2003). New aspects of impact reactivity of polynitro compounds. Part IV. Allocation of polynitro compounds on the basis of their impact sensitivities. Propellants, Explos., Pyrotech. 28, 308-313.

Zeman, S., Roháč, M., Friedl, Z., Růžička, A., and Lyčka, A. (2010). Crystallography and Structure-Property Relationships of 2, 2'', 4, 4', 4'', 6, 6', 6''-Octanitro-1, 1': 3', 1''-Terphenyl (ONT).

- Propellants, Explos., Pyrotech. *35*, 130-135.
- Zeng, Z., Guo, Y., Twamley, B., and Jean'ne, M.S. (2009). Energetic polyazole polynitrobenzenes and their coordination complexes. *Chem. Commun.*, 6014-6016.
- Zhang, H., Guo, C., Wang, X., Xu, J., He, X., Liu, Y., Liu, X., Huang, H., and Sun, J. (2013). Five energetic cocrystals of BTF by intermolecular hydrogen bond and  $\pi$ -stacking interactions. *Cryst. Growth Des.* *13*, 679-687.
- Zhang, J., Wang, J., Xu, H., and Zhou, X. (2013). Synthesis and thermal decomposition kinetics of hexanitroazobenzene. *Chin. J. Energ. Mater.* *21*, 7-11.
- Zhang, J., and Xiao, H. (2002). Computational studies on the infrared vibrational spectra, thermodynamic properties, detonation properties, and pyrolysis mechanism of octanitrocubane. *J. Chem. Phys.* *116*, 10674-10683.
- Zhang, J., Xue, B., Rao, G., Chen, L., and Chen, W. (2018). Thermal decomposition characteristic and kinetics of DINA. *J. Therm. Anal. Calorim.* *133*, 727-735.
- Zhang, L., Jiang, S.-L., Yu, Y., Long, Y., Zhao, H.-Y., Peng, L.-J., and Chen, J. (2016). Phase Transition in Octahydro-1,3,5,7-tetranitro-1,3,5,7-tetrazocine (HMX) under Static Compression: An Application of the First-Principles Method Specialized for CHNO Solid Explosives. *J. Phys. Chem. B* *120*, 11510-11522.
- Zhang, P., Kumar, D., Zhang, L., Shem-Tov, D., Petrutik, N., Chinnam, A.K., Yao, C., Pang, S., and Gozin, M. (2019). Energetic Butterfly: Heat-Resistant Diaminodinitro trans-Bimane. *Molecules* *24*, 4324.
- Zhang, X., Dong, H., Zhou, Z., and Li, H. (2010). Synthesis and Properties of 3-Amino-2,4,6-Trinitrophenol and 3,5-Diamino-2,4,6-Trinitrophenol. *Acta Armamentarii* *31*, 1341-1345.
- Zhang, X., Xiong, H., Yang, H., and Cheng, G. (2017). 1,4,1,6,3,4,3,6,5,4,5,6,7,4,7,6-Octanitro-2,4,6,8-tetraoxa-1,3,5,7(1,3)-tetrabenzenacyclooctaphane and its derivatives: thermally stable explosives with outstanding properties. *New J. Chem.* *41*, 5764-5769.
- Zhang, Y., Zhou, C., Wang, B., Zhou, Y., Xu, K., Jia, S., and Zhao, F. (2014). Synthesis and Characteristics of Bis (nitrofurazano) furazan (BNFF), an Insensitive Material with High Energy -Density. *Propellants, Explos., Pyrotech.* *39*, 809-814.
- Zhao, X., and Liu, Z. (2013). 2,6-Diamino-3,5-dinitropyrazine-1-oxide synthesis and its explosion properties. *J. Chem. Eng. Chin. Univ.* *2*, 248.
- Zhou, Y., Wang, B., Li, J., Zhou, C., Hu, L., Chen, Z., and Zhang, Z. (2011). Study on Synthesis, Characterization and Properties of 3,4-Bis(4'-nitrofurazano-3'-yl)furoxan. *Acta Chim. Sin. (Chin. Ed.)* *69*, 1673-1680.
